# Supplementary material
Source: PubMed Central journal article supplement (PMC4545281)
Supplement: NIHMS714329-supplement-Figures_and_Tables.pdf [file NIHMS714329-supplement-Figures_and_Tables.pdf]

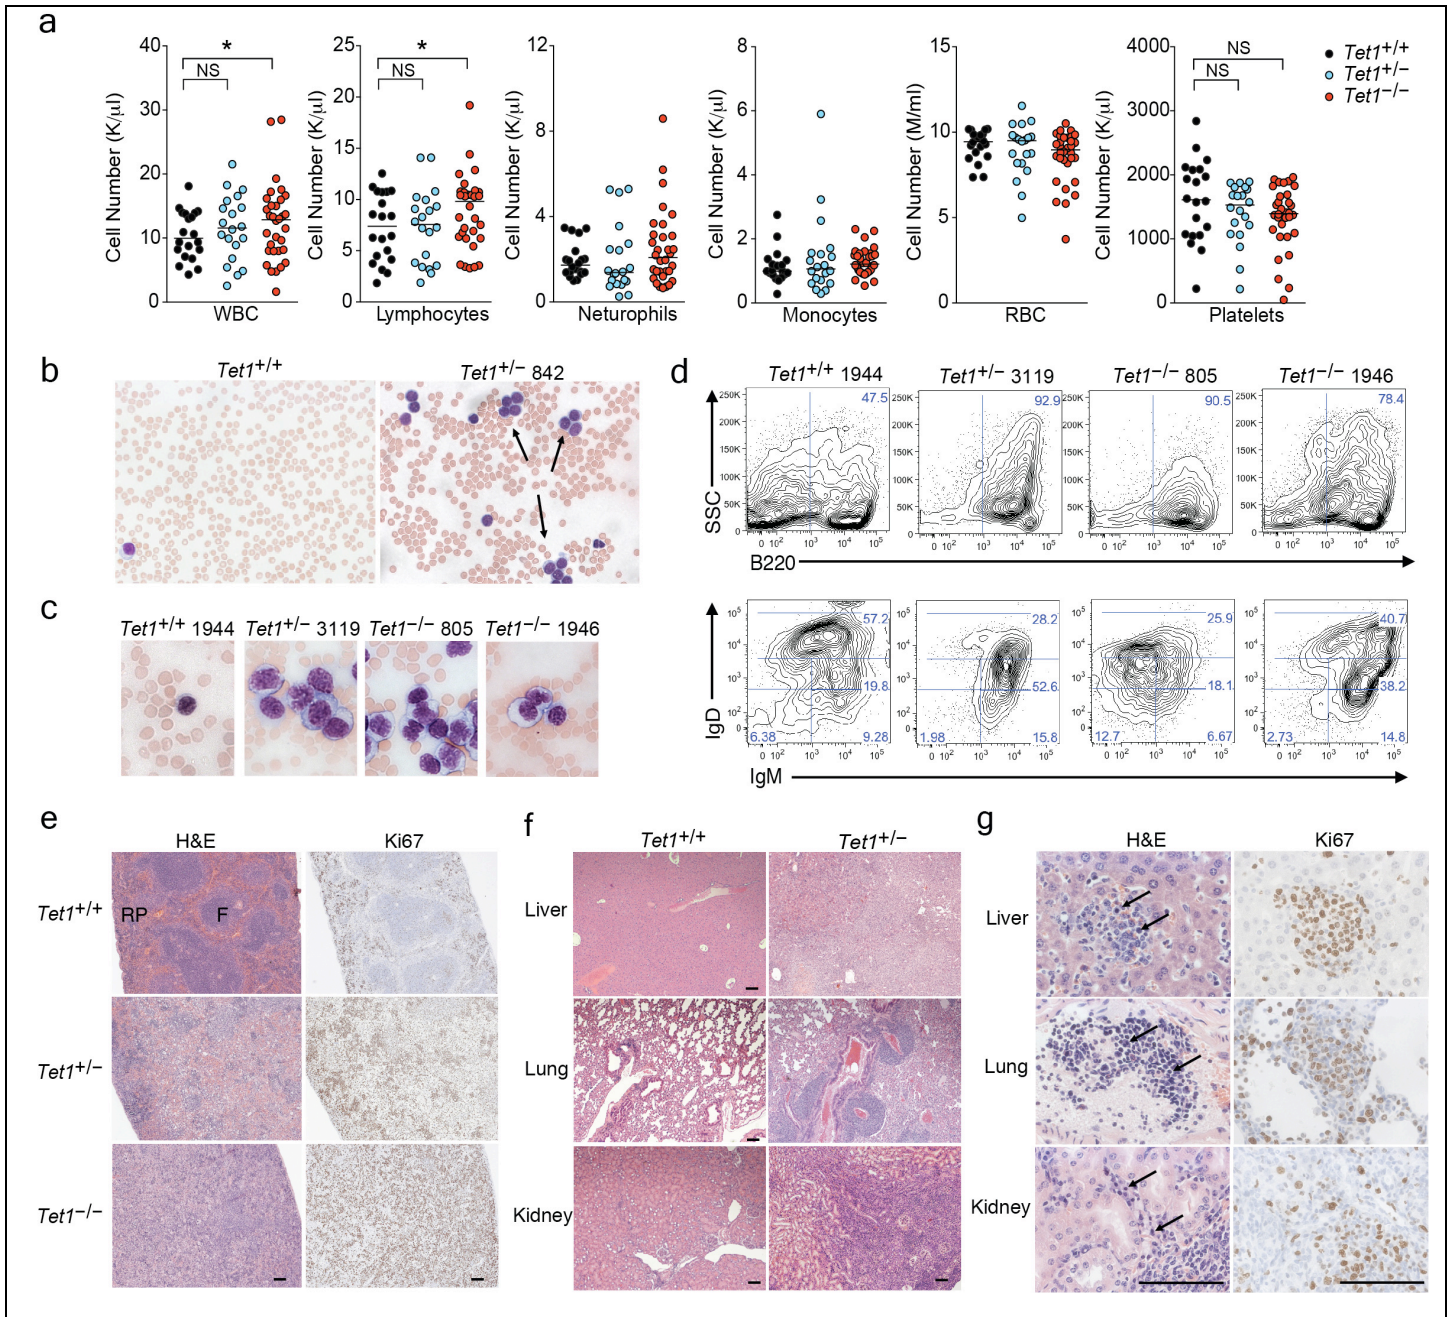

## Supplementary Figure 1

### Peripheral blood analysis and organ histology of sick *Tet1*-deficient mice.

**a)** Hemavet quantification of whole blood cell numbers from *Tet1*<sup>+/+</sup>, *Tet1*<sup>+/-</sup> and *Tet1*<sup>-/-</sup> mice aged 18-24 months. WBC = white blood cells, RBC = red blood cells, NS = not significant, \* *P* = <0.05. Small horizontal lines indicate the mean; *Tet1*<sup>+/+</sup> (n = 20), *Tet1*<sup>+/-</sup> (n = 20) and *Tet1*<sup>-/-</sup> (n = 32). **b-c)** Peripheral blood smears stained with Wright-Giemsa and **d)** flow cytometric analysis of peripheral blood from sick *Tet1*-deficient mice compared to age-matched controls. Data are representative of 3 independent experiments, n = 8-10 mice per genotype. **e)** Histological analysis of spleens from sick *Tet1*<sup>+/-</sup> and *Tet1*<sup>-/-</sup> mice compared to *Tet1*<sup>+/+</sup> controls. Sections were stained with H&E and Ki67 as indicated. RP = Red pulp, F = Follicle. **f)** H&E staining of liver, lung and kidney sections from sick *Tet1*<sup>+/-</sup> compared to *Tet1*<sup>+/+</sup> mice showing diffuse lymphocytic infiltration compared to age-matched *Tet1*<sup>+/+</sup> mice. **g)** H&E and Ki67 staining of hyperproliferative infiltrating cells in kidney, lung and liver of *Tet1*-deficient mice. Histology is representative of *Tet1*<sup>-/-</sup> *Tet1*<sup>+/-</sup> mice (n = 6-8 mice per genotype). Scale bar = 100µm in all panels.



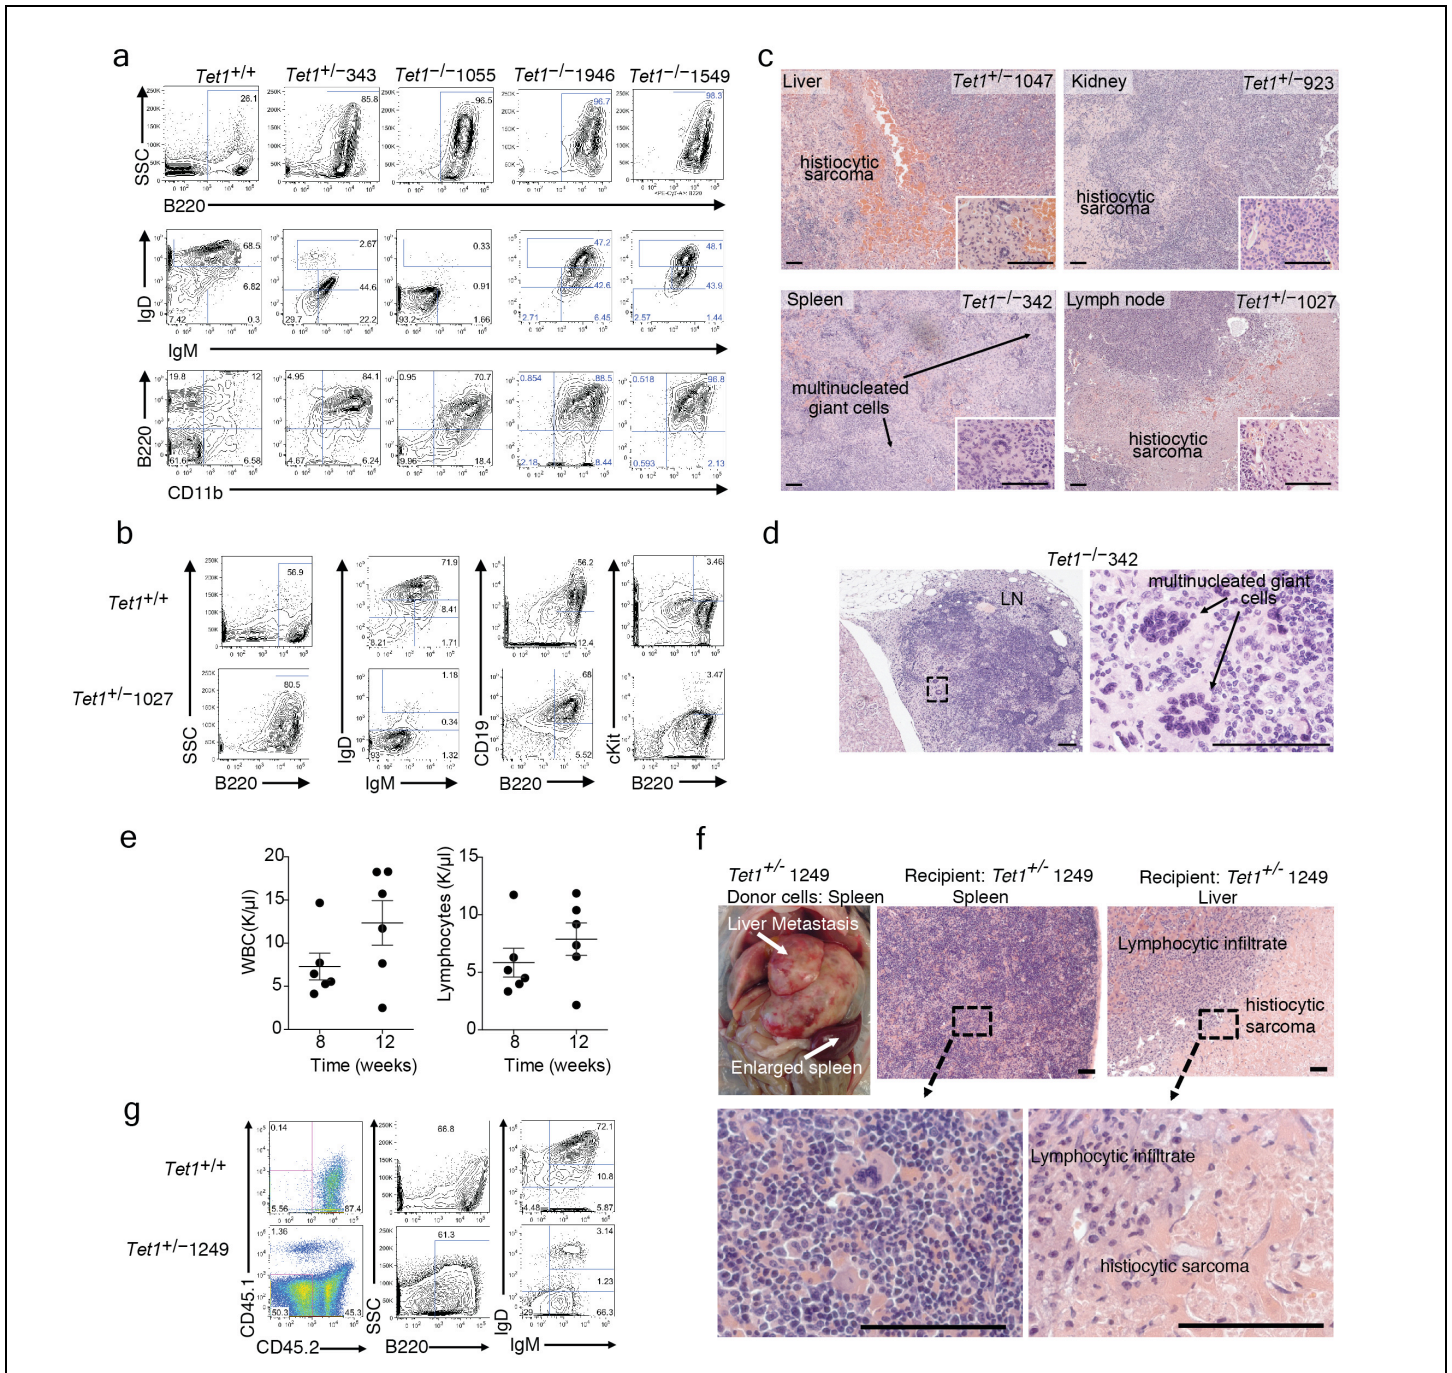

**Supplementary Figure 2**

**Tet1-deficient B cell lymphomas display both IgM<sup>-</sup> and IgM<sup>+</sup> phenotypes and are transplantable.**

**a-b)** Additional examples of flow cytometric analysis of lymph nodes from sick *Tet1*<sup>+/-</sup> and *Tet1*<sup>-/-</sup> mice compared to *Tet1*<sup>+/+</sup> controls, displaying IgM<sup>-</sup>, IgM<sup>+</sup> and CD11b<sup>+</sup> staining patterns. **c-d)** H&E stained sections of liver, kidney, spleen and lymph nodes from sick *Tet1*<sup>+/-</sup> and *Tet1*<sup>-/-</sup> mice with multinucleated giant cells and histiocytic sarcoma. Scale bar = 100µm in all panels. **e)** Recipient mice 12 weeks post-transplant. Upper left panel; example of gross-anatomy of recipient mice with white patchy liver and enlarged spleen. Upper right and lower panels; H&E staining of recipient mouse tissue histological sections, with spleen and liver infiltration, and histiocytic sarcoma in the liver. Scale bar = 100µm in all panels. **f)** White blood cell (WBC) and lymphocyte cell counts in the peripheral blood of *Tet1*-deficient tumor recipient mice 8 and 12 weeks post-transplant. **g)** Representative flow cytometric analysis of spleen cells from recipient mice gated on CD45.2<sup>+</sup> donor cells co-stained for B cell (B220) and surface Ig (IgD and IgM) expression.

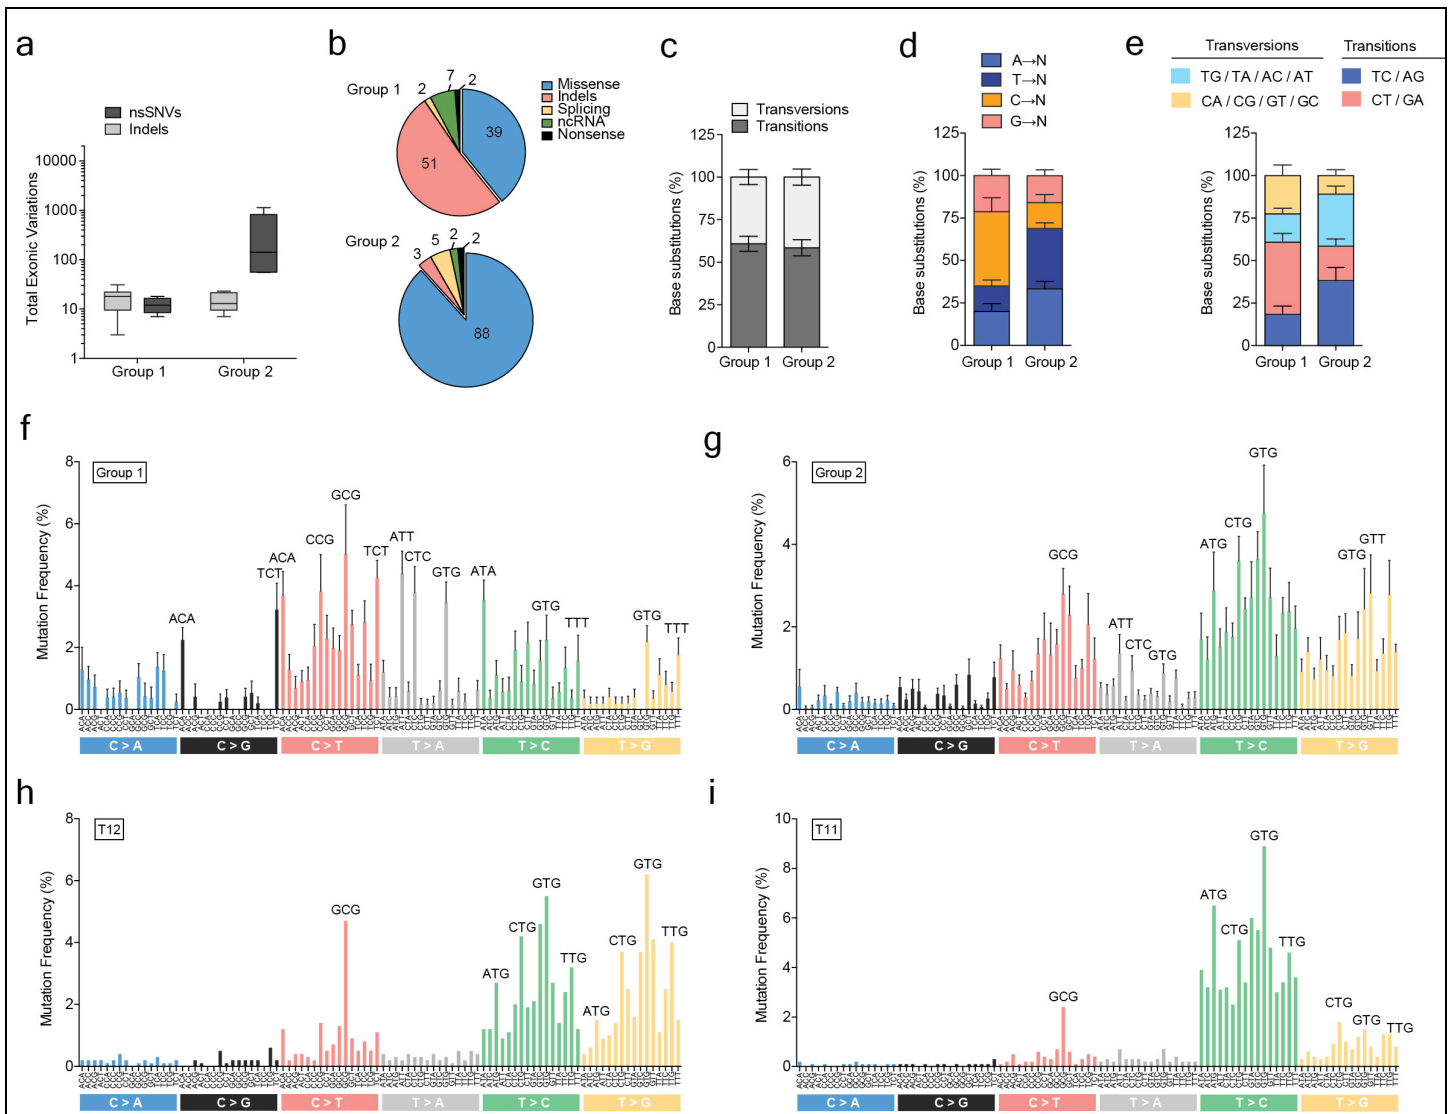

**Supplementary Figure 3**

**Mutational analysis and base substitution frequency in Tet1-deficient lymphomas.**

Exome sequencing data for thirteen Tet1-deficient tumors (T1-13) were divided into 2 groups; Group 1 = low mutation frequency (<50 total exonic variations), Group 2 = high mutation frequency (50-1200 total exonic variations). Low (Group1) and high-grade (Group 2) mutated tumors were compared for **a**) average number of indels and nsSNVs, **b**) mutation type and **c**) frequency of transversion or transition base substitutions. A, T, C or G base substitution frequencies were calculated **d**) overall and **e**) in the context of transversion or transition mutation. Average mutation frequency of base substitutions in **f**) low (Group1) and **g**) high-grade (Group 2) mutated Tet1-deficient tumors according to trinucleotide context with examples of individual high-grade mutated tumors; **h**) T12 and **i**) T11. Mean  $\pm$  SEM (Group 1, n = 8; Group 2, n = 5).

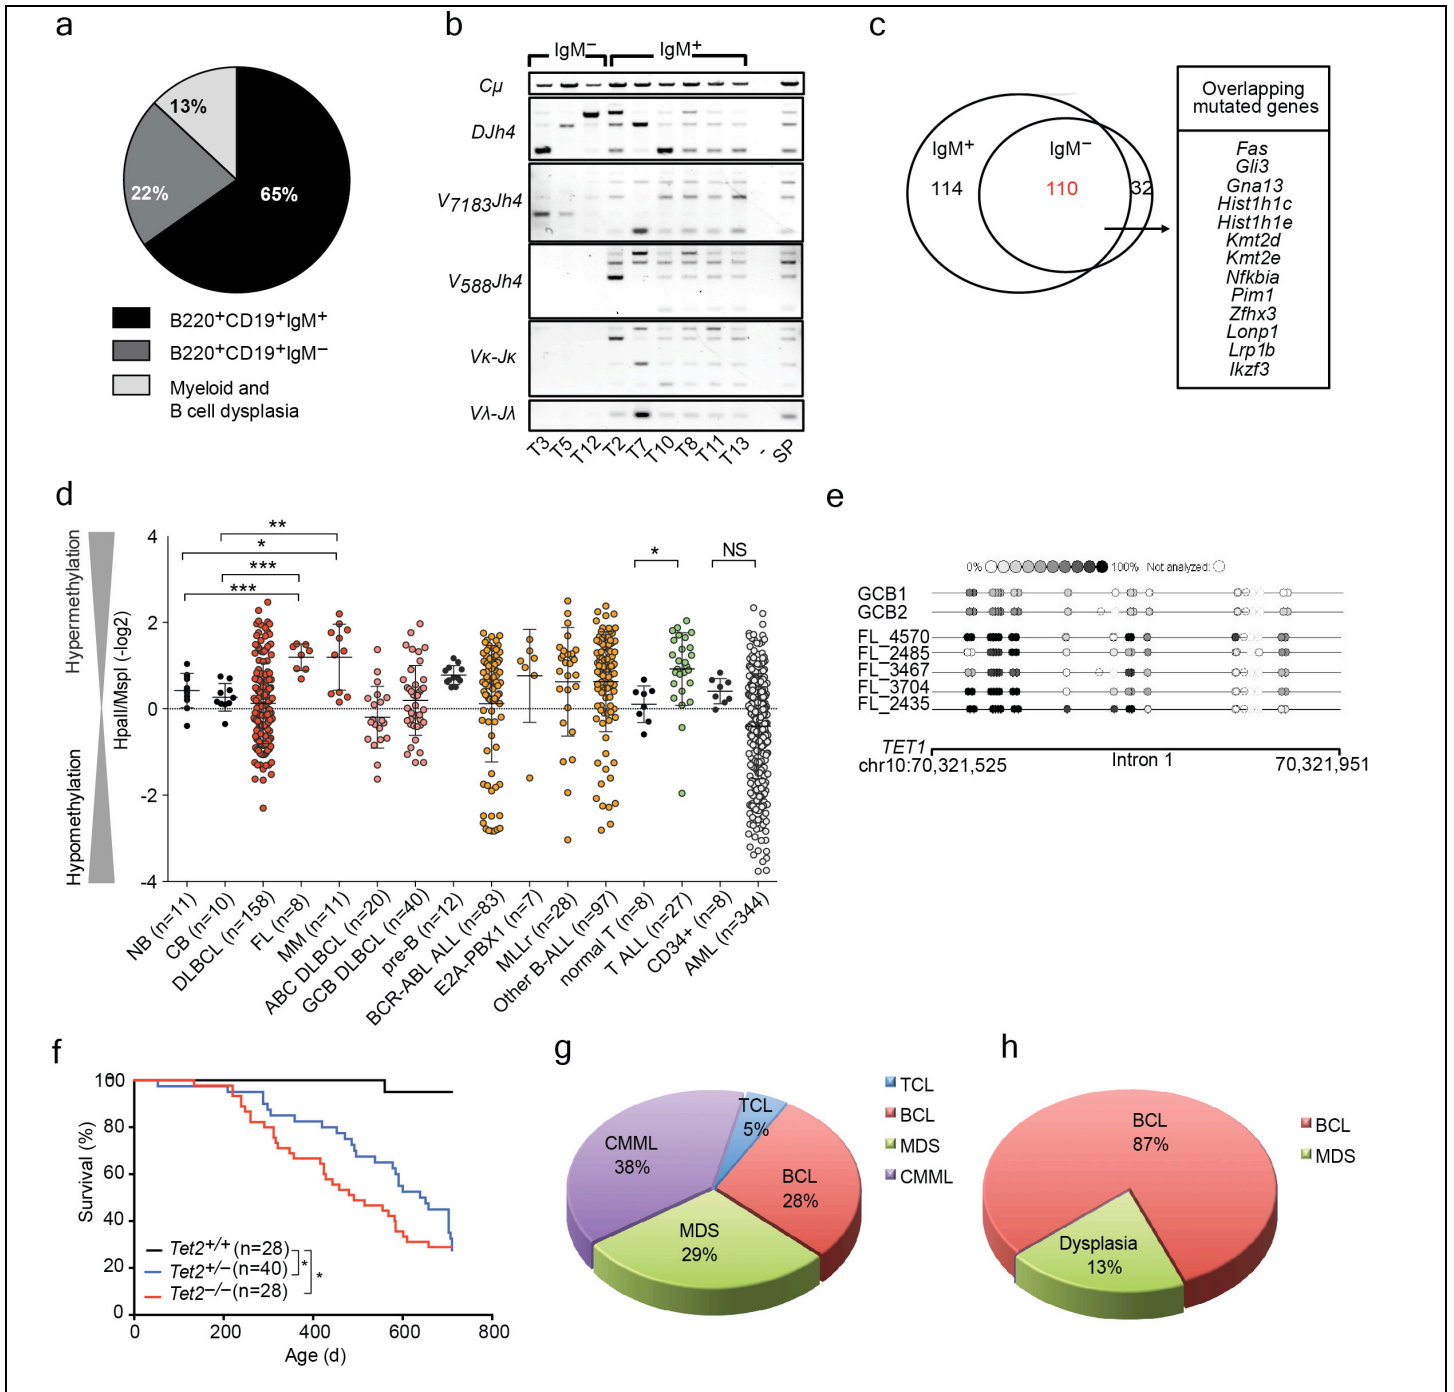

**Supplementary Figure 4**

**Overlapping mutations in IgM<sup>+</sup> and IgM<sup>-</sup> Tet1-deficient tumors, hypermethylation of *TET1* in mature B cell lymphomas and contrasting disease spectra of Tet1- and Tet2-deficiency in mice.**

**a**) Frequency of IgM<sup>+</sup> and IgM<sup>-</sup> lymphomas in Tet1-deficient mice. **b**) V(D)J-rearrangements in DNA of exome sequenced tumor samples. DNA isolated from total splenic cells (SP) was used as a control for the amplification of the constant heavy chain (C $\mu$ ), and for the rearrangements of D-J<sub>H</sub>4, V<sub>7183</sub>-J<sub>H</sub>4 and V<sub>588</sub>-J<sub>H</sub>4, V $\kappa$ -J $\kappa$  and V $\lambda$ -J $\lambda$ . **c**) Venn Diagram of overlapping recurrently mutated genes in IgM<sup>+</sup> and IgM<sup>-</sup> tumors. **d**) HELP assay for methylation in patient samples are shown; human naïve B (NB), centroblast B (CB), diffuse large B cell lymphoma (DLBCL), follicular lymphoma (FL), multiple myeloma (MM), activated B-cell-like (ABC) and germinal center B-cell-like (GCB) DLBCL, precursor B (Pre-B), B-acute lymphoblastic leukemia (B-ALL) subtypes – BCR-ABL, E2A-PBX1, MLL-rearranged (MLLr)



and other, normal T, T-acute lymphoblastic leukemia (T-ALL), CD34<sup>+</sup> progenitor cells and acute myeloid leukemia (AML). **e)** EpiGram of an amplicon targeting CpGs in the first intron of *TET1* used in Sequenom-Targeted Methylation Analysis by Sequenom MassARRAY. Two normal human germinal center B (GCB) samples are displayed compared to 5 FL patient samples. Circles depict increasing CpG methylation status from 0-100% as indicated. **f)** Kaplan-Meier survival curve of *Tet2*-deficient mice with heterozygous (*Tet2*<sup>+/-</sup>) and homozygous (*Tet2*<sup>-/-</sup>) deletion compared to wild-type mice (*Tet2*<sup>+/+</sup>). \* *P* = <0.0005. Frequency of diseases; acute myeloid leukemia (AML) and chronic myelomonocytic leukemia (CMML), myeloid dysplasia (MDS), B cell lymphoma (BCL) and T-cell lymphoma (TCL) observed in **g)** *Tet2*- and **h)** *Tet1*-deficient mice.

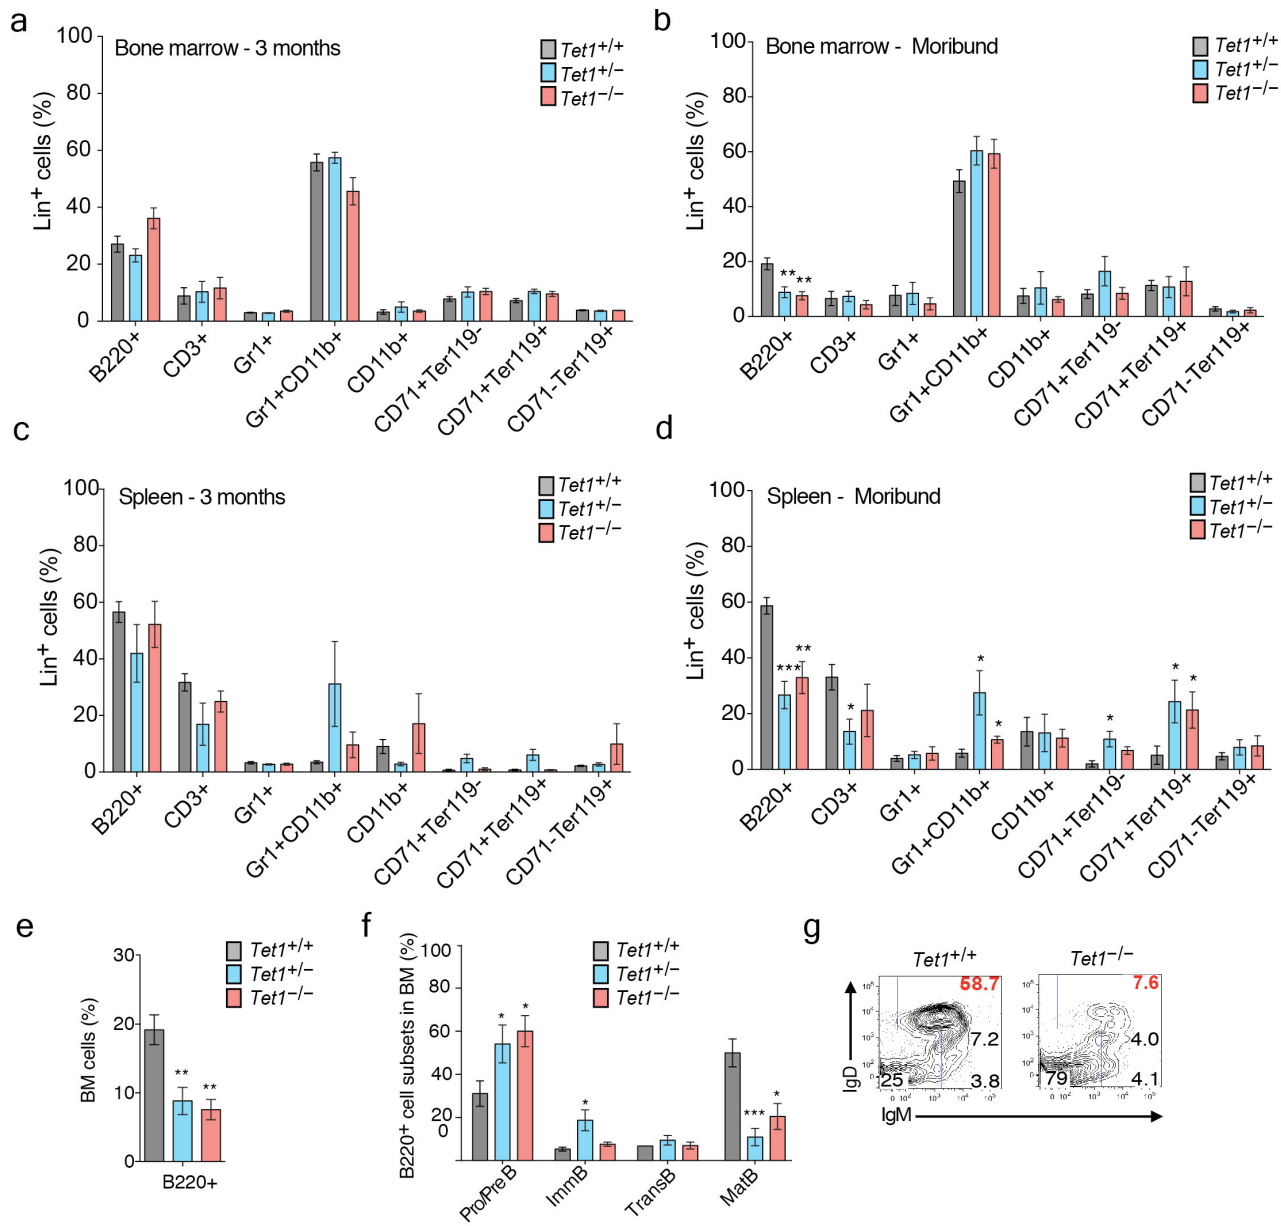

**Supplementary Figure 5**

**Tet1-deficiency causes a decrease in mature B cell frequency in the bone marrow and spleen.**

Summary of flow cytometric analysis of the frequency of lineage positive (% Lin<sup>+</sup>) cells in the **a-b**) bone marrow and **c-d**) spleen of *Tet1*<sup>+/+</sup>, *Tet1*<sup>+/-</sup> and *Tet1*<sup>-/-</sup> mice. B cell (B220<sup>+</sup>), T cell (CD3<sup>+</sup>), granulocyte (Gr1<sup>+</sup>), neutrophil (Gr1<sup>+</sup>CD11b<sup>+</sup>), monocyte (CD11b<sup>+</sup>), progenitor (CD71<sup>+</sup>Ter119<sup>-</sup>), precursor (CD71<sup>+</sup>Ter119<sup>+</sup>) and mature nucleated erythroid cell (CD71<sup>-</sup>Ter119<sup>+</sup>) frequencies are shown. **e-f**) Summary of flow cytometric analysis to assess the frequency of B220<sup>+</sup> B cell subsets in the bone marrow stained with IgM and IgD for progenitor and precursor B (Pro/PreB), immature (ImmB), transitional (TransB) and mature B cells (MatB). **g**) Representative flow cytometric analysis of the frequency of B cell subsets in the bone marrow of *Tet1*<sup>+/+</sup> and moribund *Tet1*<sup>-/-</sup> mice. All bar graphs display the mean ± SEM (3 months, n = 4 mice per genotype; Moribund, n = 6-8 mice per genotype); \* P = <0.01, \*\* P = <0.001, \*\*\* = P <0.0001.



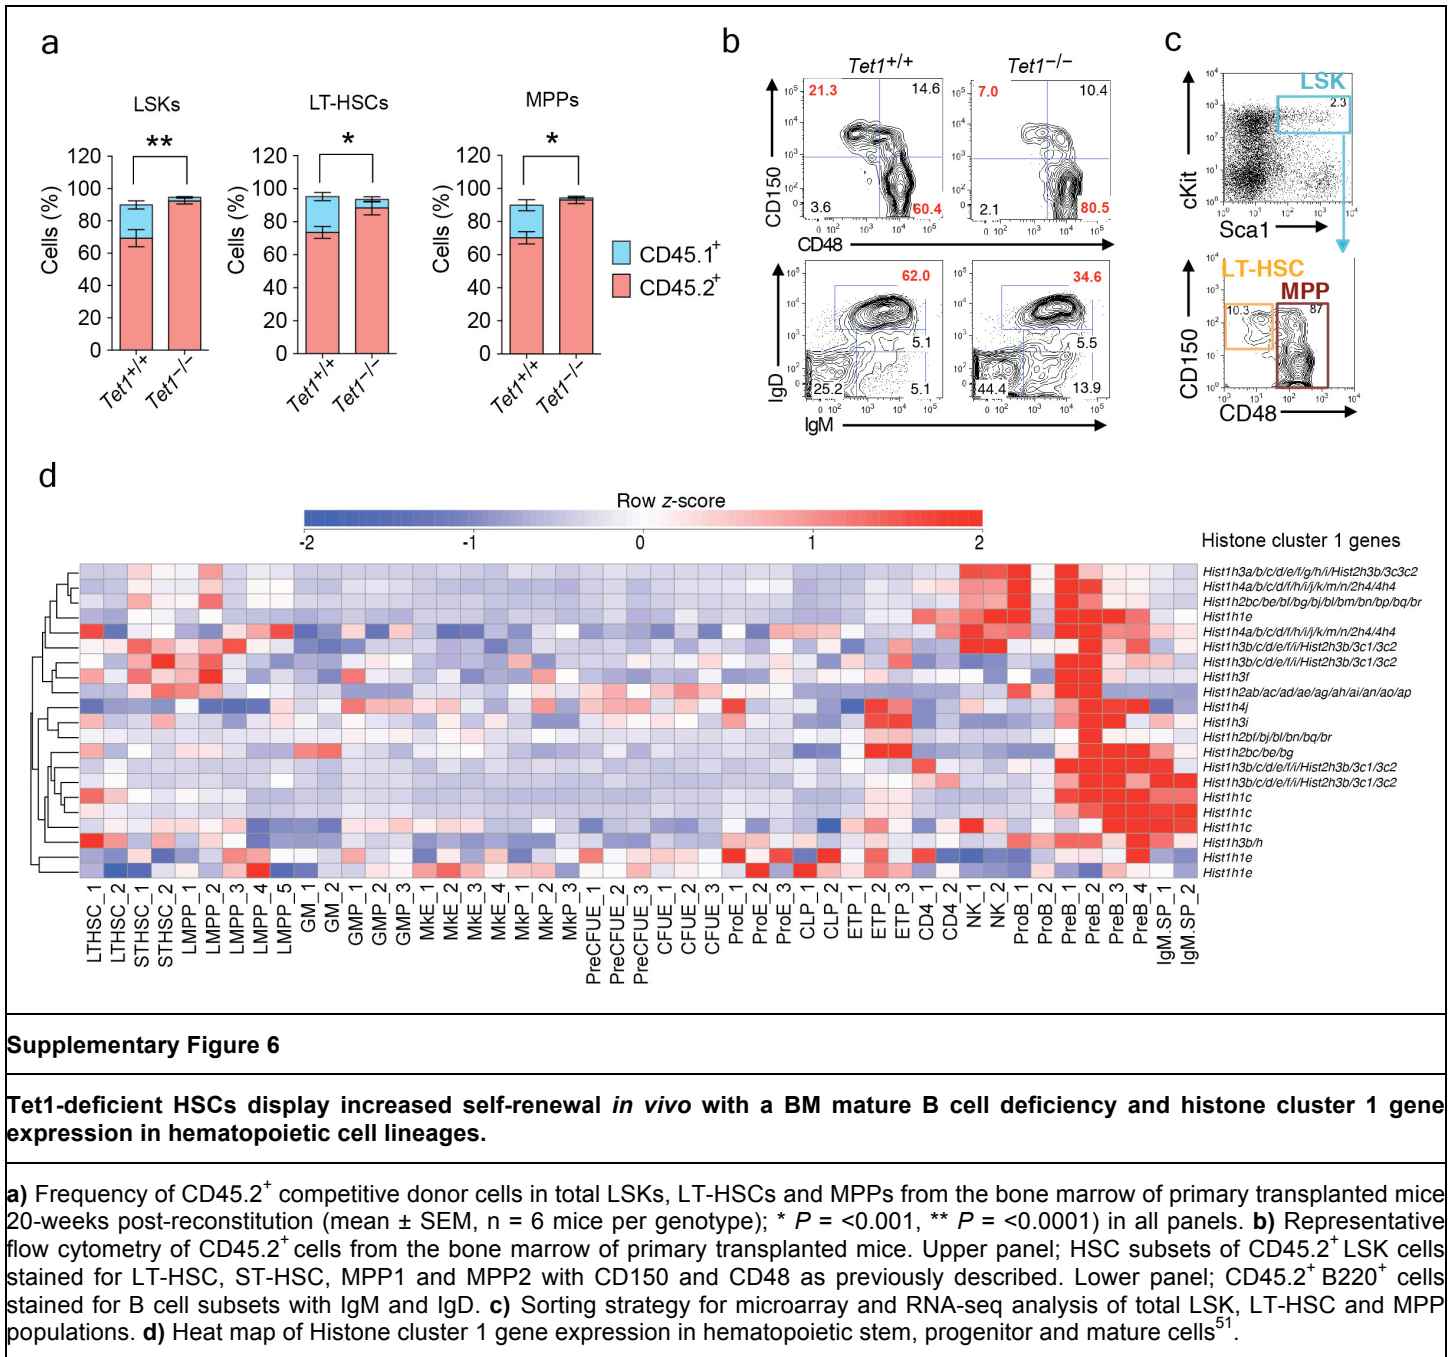

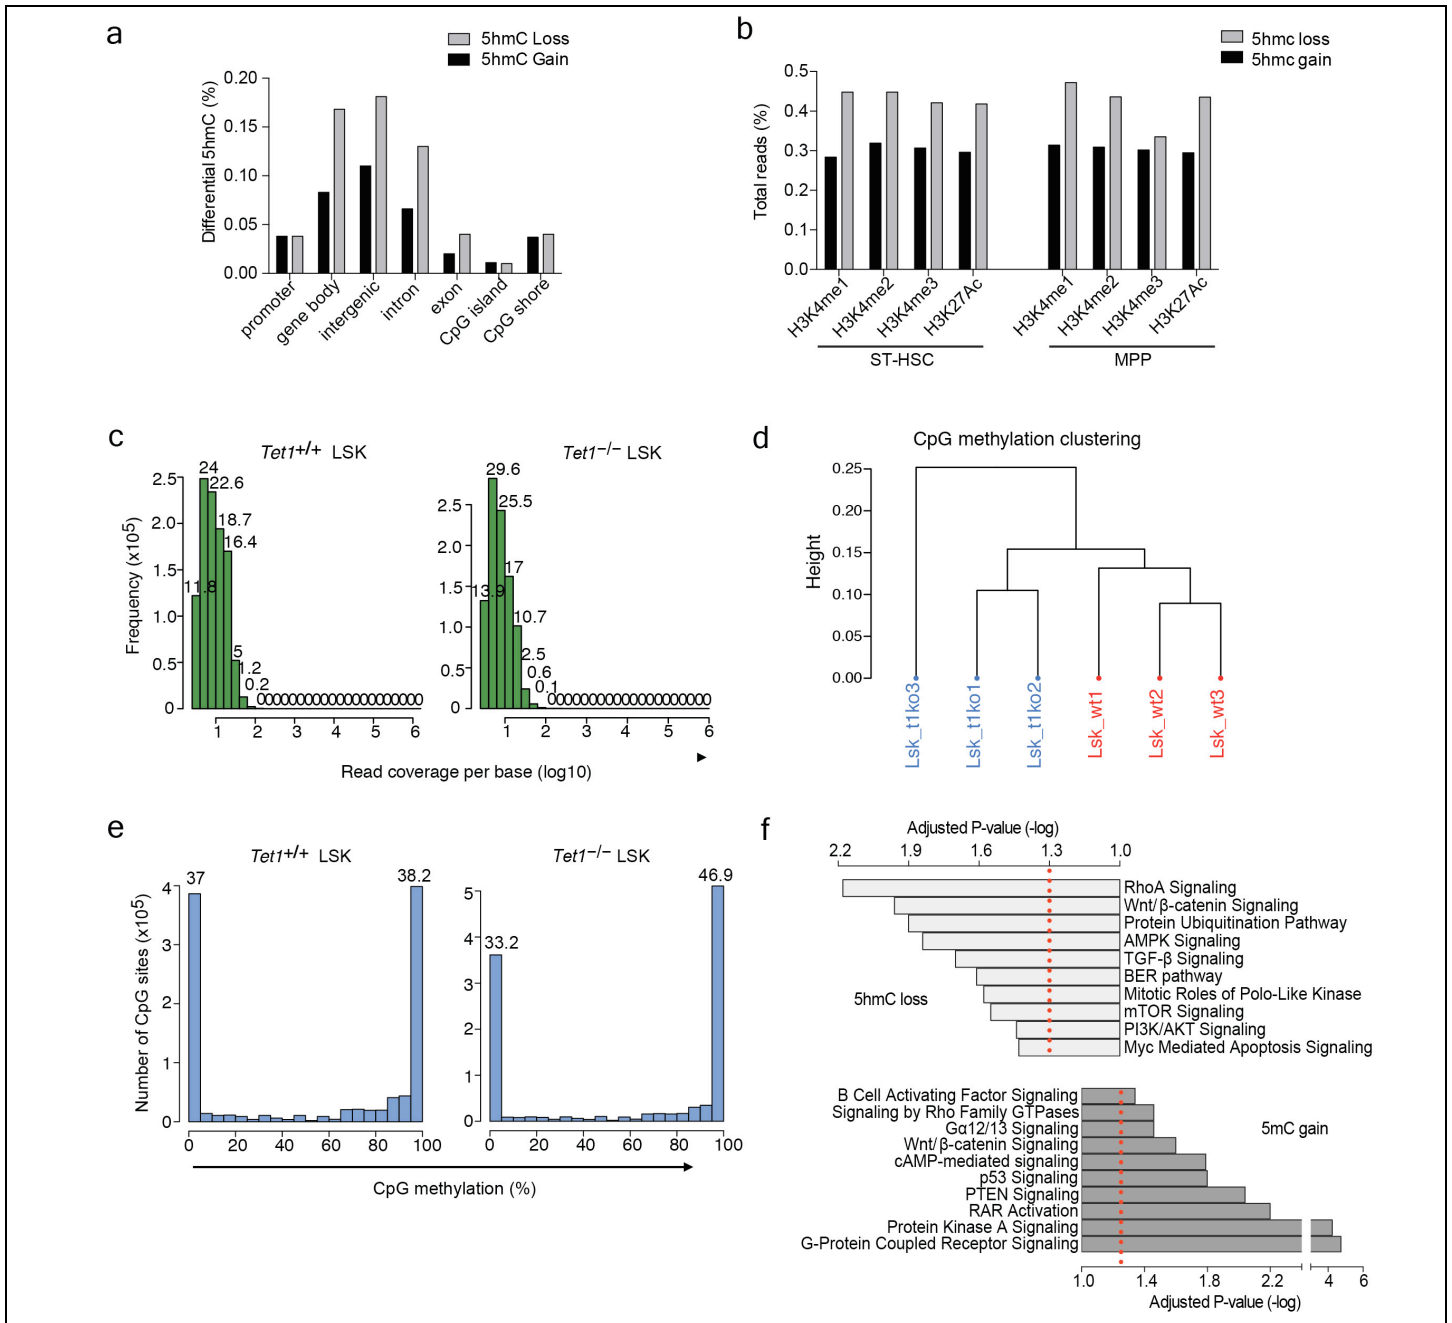

**Supplementary Figure 7**

**5hmC losses and 5mC gains in Tet1-deficient LSKs target genes involved in DNA repair, G-protein coupled receptor signaling and tumor suppressor pathways.**

**a)** Percent of 5hmC losses and gains across genomic regions. **b)** Overlap of 5hmC losses and gains with enhancer histone marks in ST-HSCs and MPPs. **c)** Coverage per base and **d)** sample clustering of RRBS data from *Tet1*<sup>+/+</sup> and *Tet1*<sup>-/-</sup> LSKs. **e)** Representative frequency of CpG sites with 0-100 percent CpG methylation in *Tet1*<sup>+/+</sup> and *Tet1*<sup>-/-</sup> LSKs. **f)** Ingenuity Pathway Analysis (IPA) software was used to generate schematic representations of genes that lose 5hmC and gain 5mC in *Tet1*<sup>-/-</sup> LSK cells. Signaling pathways displayed include genes pathways involved in tumor suppression (TGF- $\beta$ , WNT/ $\beta$ -Catenin, p53 and PTEN), DNA repair (BER) and B cell function (RhoA, G-protein coupled). Log adjusted *P*-value for significance is shown along the x axis. Red lines indicate threshold of significance (*P* = 0.05).



**Supplementary Table 1. Summary of necropsy findings and immunophenotyping of hematopoietic organs in terminally diseased Tet1-deficient mice.**

| Mouse ID | Tet1 Genotype | Age (months) | Sex | Hematopoietic Disease Phenotype                        | Disease classification        | Hematopoietic organs affected                      | Necropsy                                    |
|----------|---------------|--------------|-----|--------------------------------------------------------|-------------------------------|----------------------------------------------------|---------------------------------------------|
| 1027     | +/-           | 19           | M   | SSChi B220+ CD11b- Gr1- IgM- IgD- cKit-                | B-ALL                         | Lymph nodes, Spleen, Peripheral blood              | Lymphadenopathy                             |
| 1249     | +/-           | 19           | M   | SSChi B220+ CD11b+ Gr1+ CD71+ Ter119+ IgM+ IgDlo cKit- | B cell Lymphoma/Mixed Lineage | Lymph nodes, Spleen, Peripheral blood              | Lymphadenopathy, Hepatomegaly, Splenomegaly |
| 1148     | +/-           | 20           | F   | SSChi B220+ CD11b+ Gr1+ IgM+ IgDlo cKit+               | B cell Lymphoma/Mixed Lineage | Lymph nodes, Spleen, Peripheral blood              | Lymphadenopathy, Splenomegaly               |
| 809      | +/-           | 21           | F   | Erythroid, Monocyte, Immature B cell expansion         | MDS, B cell dysplasia         | Lymph nodes, Spleen, Peripheral blood              | Lymphadenopathy                             |
| 923      | +/-           | 21           | F   | Erythroid, Monocyte, Immature B cell expansion         | MDS, B cell dysplasia         | Spleen, Bone marrow                                | Splenomegaly                                |
| 1047     | +/-           | 21           | M   | SSChi B220+ CD11b+ Gr1+ CD71- Ter119- IgM- IgD - cKit+ | B cell Lymphoma/Mixed Lineage | Lymph nodes, Spleen, Bone marrow                   | Hepatomegaly, Splenomegaly                  |
| 655      | +/-           | 22           | F   | SSChi B220+ CD11b+ Gr1+ IgM+ IgDlo cKit-               | B cell Lymphoma/Mixed Lineage | Lymph nodes, Spleen, Peripheral blood              | Lymphadenopathy, Splenomegaly               |
| 668      | +/-           | 22           | F   | B220+ IgM+ IgDlo Immature B cell expansion             | B cell dysplasia              | Spleen, Bone marrow                                | Hepatomegaly, Splenomegaly                  |
| 343      | +/-           | 27           | M   | SSChi B220+ CD11b+ Gr1+ IgM+ IgD- cKit+                | B cell Lymphoma/Mixed Lineage | Lymph nodes, Spleen, Bone marrow, Peripheral Blood | Lymphadenopathy, Hepatomegaly, Splenomegaly |
| 1142     | +/-           | 27           | M   | SSChi B220+ CD11b+ Gr1- CD71-IgM+ IgD+ cKit+ CD43+     | B cell Lymphoma/Mixed Lineage | Spleen, Peripheral blood                           | Hepatomegaly                                |
| 3119     | +/-           | 22           | F   | SSChi B220+ CD11b+ Gr1- CD71-IgM+ IgDlo cKit-          | B cell Lymphoma/Mixed Lineage | Spleen, Peripheral blood                           | Normal sized organs                         |
| 3112     | +/-           | 27           | M   | SSChi B220+ CD11b+ Gr1- CD71+ IgM- IgD- cKit+ CD43+    | B cell Lymphoma/Mixed Lineage | Spleen                                             | Lymphadenopathy                             |
| 1038     | -/-           | 19           | F   | SSChi B220+ CD11b+ Gr1- IgM+ IgDlo                     | B cell Lymphoma/Mixed Lineage | Spleen, Peripheral blood                           | Hepatomegaly                                |
| 1055     | -/-           | 20           | F   | SSChi B220+ CD11b+ Gr1lo CD71- Ter119- IgM- IgD- cKit- | B cell Lymphoma/Mixed Lineage | Lymph nodes                                        | Lymphadenopathy                             |
| 1946     | -/-           | 22           | F   | SSChi B220+ CD11b+ Gr1lo CD71+ IgM+ IgD+ cKit+ CD43+   | B cell Lymphoma/Mixed Lineage | Lymph nodes, Peripheral blood                      | Lymphadenopathy                             |
| 3113     | -/-           | 22           | M   | SSChi B220+ CD11b+ Gr1- CD71+ IgM- IgD- cKit-          | B cell Lymphoma/Mixed Lineage | Lymph nodes, Peripheral blood                      | Lymphadenopathy                             |
| 732      | -/-           | 22           | F   | SSChi B220+ CD11b+ Gr1+ CD71+ Ter119+ IgM+ IgDlo cKit+ | B cell Lymphoma/Mixed Lineage | Spleen, Peripheral blood                           | Normal sized organs                         |
| 1548     | -/-           | 26           | M   | SSChi B220+ CD11b+ Gr1- CD71+ IgM- IgD- cKit+ CD43+    | B cell Lymphoma/Mixed Lineage | Lymph nodes, Spleen, Peripheral blood              | Lymphadenopathy                             |
| 1549     | -/-           | 26           | F   | SSChi B220+ CD11b+ Gr1- CD71- IgM+ IgD+ cKit+ CD43+    | B cell Lymphoma/Mixed Lineage | Lymph nodes, Spleen, Peripheral blood              | Lymphadenopathy, Hepatomegaly               |
| 330      | -/-           | 26           | F   | Erythroid, Monocyte, Immature B cell expansion         | MDS, B cell dysplasia         | Spleen, Peripheral blood                           | Lymphadenopathy                             |
| 805      | -/-           | 30           | F   | SSChi B220+ CD11b+ Gr1- CD71- IgM+ IgD+ cKit-          | B cell Lymphoma/Mixed Lineage | Spleen, Peripheral blood                           | Hepatomegaly                                |

**Supplementary Table 2. Summary of Tet1-deficient tumor samples selected for whole exome sequencing analysis.**

| Tumor Sample | Mouse ID | Age (months) | Genotype                   | Tumor source | Tumor Phenotype                                                                                                                                                           |
|--------------|----------|--------------|----------------------------|--------------|---------------------------------------------------------------------------------------------------------------------------------------------------------------------------|
| T1           | #655     | 22           | <i>Tet1</i> <sup>+/-</sup> | SP           | SSC <sup>high</sup> B220 <sup>+</sup> CD11b <sup>+</sup> Gr1 <sup>+</sup> IgM <sup>+</sup> IgD <sup>low</sup> cKit <sup>-</sup>                                           |
| T2           | #732     | 22           | <i>Tet1</i> <sup>-/-</sup> | SP           | SSC <sup>high</sup> B220 <sup>+</sup> CD11b <sup>+</sup> Gr1 <sup>+</sup> CD71 <sup>+</sup> Ter119 <sup>+</sup> IgM <sup>+</sup> IgD <sup>low</sup> cKit <sup>+</sup>     |
| T3           | #1027    | 19           | <i>Tet1</i> <sup>+/-</sup> | LN           | SSC <sup>high</sup> B220 <sup>+</sup> CD11b <sup>-</sup> Gr1 <sup>-</sup> IgM <sup>-</sup> IgD <sup>-</sup> cKit <sup>-</sup>                                             |
| T4           | #343     | 26           | <i>Tet1</i> <sup>+/-</sup> | LN           | SSC <sup>high</sup> B220 <sup>+</sup> CD11b <sup>+</sup> Gr1 <sup>+</sup> IgM <sup>+</sup> IgD <sup>-</sup> cKit <sup>+</sup>                                             |
| T5           | #1047    | 21           | <i>Tet1</i> <sup>+/-</sup> | SP           | SSC <sup>high</sup> B220 <sup>+</sup> CD11b <sup>+</sup> Gr1 <sup>+</sup> CD71 <sup>-</sup> Ter119 <sup>-</sup> IgM <sup>-</sup> IgD <sup>-</sup> cKit <sup>+</sup>       |
| T6           | #1249    | 21           | <i>Tet1</i> <sup>+/-</sup> | SP           | SSC <sup>high</sup> B220 <sup>+</sup> CD11b <sup>+</sup> Gr1 <sup>+</sup> CD71 <sup>+</sup> Ter119 <sup>+</sup> IgM <sup>+</sup> IgD <sup>low</sup> cKit <sup>-</sup>     |
| T7           | #805     | 30           | <i>Tet1</i> <sup>-/-</sup> | PB           | SSC <sup>high</sup> B220 <sup>+</sup> CD11b <sup>+</sup> Gr1 <sup>-</sup> CD71 <sup>-</sup> IgM <sup>+</sup> IgD <sup>+</sup> cKit <sup>-</sup>                           |
| T8           | #1142    | 27           | <i>Tet1</i> <sup>+/-</sup> | SP           | SSC <sup>high</sup> B220 <sup>+</sup> CD11b <sup>+</sup> Gr1 <sup>-</sup> CD71 <sup>-</sup> IgM <sup>+</sup> IgD <sup>+</sup> cKit <sup>-</sup> CD43 <sup>-</sup>         |
| T9           | #3112    | 27           | <i>Tet1</i> <sup>+/-</sup> | SP           | SSC <sup>high</sup> B220 <sup>+</sup> CD11b <sup>+</sup> Gr1 <sup>-</sup> CD71 <sup>+</sup> IgM <sup>+</sup> IgD <sup>+</sup> cKit <sup>-</sup> CD43 <sup>-</sup>         |
| T10          | #1549    | 26           | <i>Tet1</i> <sup>-/-</sup> | LN           | SSC <sup>high</sup> B220 <sup>+</sup> CD11b <sup>+</sup> Gr1 <sup>-</sup> CD71 <sup>-</sup> IgM <sup>+</sup> IgD <sup>+</sup> cKit <sup>+</sup> CD43 <sup>-</sup>         |
| T11          | #1946    | 22           | <i>Tet1</i> <sup>-/-</sup> | LN           | SSC <sup>high</sup> B220 <sup>+</sup> CD11b <sup>+</sup> Gr1 <sup>low</sup> CD71 <sup>+</sup> IgM <sup>+</sup> IgD <sup>+</sup> cKit <sup>+</sup> CD43 <sup>-</sup>       |
| T12          | #3113    | 22           | <i>Tet1</i> <sup>-/-</sup> | LN           | SSC <sup>high</sup> B220 <sup>+</sup> CD11b <sup>+</sup> Gr1 <sup>-</sup> CD71 <sup>+</sup> IgM <sup>-</sup> IgD <sup>-</sup> cKit <sup>-</sup> CD43 <sup>-</sup>         |
| T13          | #1548    | 26           | <i>Tet1</i> <sup>-/-</sup> | LN           | SSC <sup>high</sup> B220 <sup>+</sup> CD11b <sup>+</sup> Gr1 <sup>-</sup> CD71 <sup>+</sup> IgM <sup>+/-</sup> IgD <sup>+/-</sup> cKit <sup>+/-</sup> CD43 <sup>+/-</sup> |



**Supplementary Table 3. Overlapping somatic mutations in IgM<sup>+</sup> and IgM<sup>-</sup> tumors from Tet1-deficient mice.**

| Tumor samples                              | Recurrently Mutated genes ( $\geq 2$ mutations/gene)                                                                                                                                                                                                                                                                                                                                                                                                                                                                                                                                                                                                                                                                                                                                                                                                                                   |
|--------------------------------------------|----------------------------------------------------------------------------------------------------------------------------------------------------------------------------------------------------------------------------------------------------------------------------------------------------------------------------------------------------------------------------------------------------------------------------------------------------------------------------------------------------------------------------------------------------------------------------------------------------------------------------------------------------------------------------------------------------------------------------------------------------------------------------------------------------------------------------------------------------------------------------------------|
| <b>IgM<sup>+</sup> and IgM<sup>-</sup></b> | <p><i>Abca1, Adam26a, Adamts5, Adamts20, Adcy2, Akap1, Ano5, Ar, Arcn1, Arhgap18, Bai1, Bnip3, Ccser1, Cdh7, Cdk5rap2, Cdv3, Cngb1, Cntn5, Cntnap5b, Cobll1, Csmc3, Cyp2c68, D630003M21Rik, Dcx, Ddx60, Dlc1, Dmd, Dnd1, Eif2ak3, Eif2b3, Fas, Gabra4, Gli3, Glis2, Gm382, Gm7173, Gm14124, Gna13, Golga4, Grik2, Gtf2a1, Hist1h1c, Hist1h1e, Il2, Kcnd2, Klf10, Klhl6, Kmt2d, Kmt2e, Lama1, Lama2, Lipn, Lonp1, Lphn3, Lrp1b, Lrrc4c, Map1a, Mmp16, Myo10, Neb, Nfkb1a, Nisch, Nlgn1, Nr3c2, Nrip1, Nr6, Nrxa1, Pappa, Pappa2, Pars2, Pcdh7, Pcdh9, Pcdh11x, Pcdh17, Pgr, Pim1, Pip4k2b, Plcb1, Prpf40b, Rhag, Robo1, Robo2, Runx1t1, Scn3a, Scn7a, Scn9a, Setd5, Shroom4, Sirpb1a, Sis, Slc9a2, Slc39a6, Slco1b2, Snx19, Speer2, Taf15, Tlr4, Tpr, Tril, Trmt10a, Trpc4, Ugt2b37, Unc13c, Usp19, Utrn, Xirp2, Zcchc6, Zfhx3, Zfhx4, Zfp804a</i></p>                                  |
| <b>IgM<sup>+</sup> only</b>                | <p><i>Adam29, Adam34, Alas1, Amer1, Arhgap20, Atp11b, Btaf1, Cadps, Ccdc71l, Cd79b, Cdh8, Cdh10, Cdk8, Cep350, Ces1e, Cfh, Chd1l, Chrna7, Chsy3, Cntln, Cntn6, Csmc1, Ctag2, Ctnna2, Dhx15, Dnah5, Dnah7b, Edc4, Efcab7, Epha3, Epha5, Ephb1, Fam135b, Fat1, Fbn2, Fign, Frmd4a, Gm4847, Gm5346, Gm13051, Gm13103, Gm13242, Grial, Hist1h2bc, Hnrnpa2b1, Htr1a, Htr2c, Igf2r, Irx1, Jmjd4, Kcnh8, Kdm6b, Kitl, Klra10, Kmt2b, Lgals4, Lgals6, Lox, Lrrc16b, Magi1, Mettl25, Mpdz, Msantd4, Ndn, Ndst4, Nlrp4a, Notch2, Ntn1, Obscn, Parp14, Pcdh18, Pclo, Pde3b, Pkd112, Plcl2, Ppan, Ppargc1a, Ppfia2, Ptpn4, Ptpnk, Pvrl3, Rasl2-9, Rnd3, Rnf20, Rnpc3, Scn1a, Sema3e, Sestd1, Slit2, Slitrk5, Smc2, Snx7, Sores1, Sorcs3, Sry, Tas2r123, Tas2r125, Tnc, Tram111, Trip12, Trps1, Try5, Tshz3, Ttn, Upf1, Ush2a, Wdr60, Xirp1, Xrn1, Yod1, Zcchc2, Zfp462, Zfp960, Zic1, Zim1</i></p> |
| <b>IgM<sup>-</sup> only</b>                | <p><i>Apobec3, Aup1, Bend5, Bod1l, Brdt, Btla, Cd74, Cntn3, Flnc, Gefc2, Gm13139, Gm13251, Gm13157, Gpr125, H2-Ab1, Herc1, Hist1h1d, Hmcn1, Ikzf3, Irx2, Jsrl1, Lrfn3, Lrfn5, Mcm2, Mroh2a, Mybl1, Nphp3, Pkhd11l, Rims2, Scaf4, Smarca2, Tenm4, Zfp112</i></p>                                                                                                                                                                                                                                                                                                                                                                                                                                                                                                                                                                                                                        |

Supplementary Table 4. Positively-enriched gene sets in *Tet1*<sup>-/-</sup> LSK, LT-HSC and MPP expression data by GSEA.

| LSK microarray                               | SIZE | NES  | NOM p-val | FDR q-val |
|----------------------------------------------|------|------|-----------|-----------|
| MEISSNER_NPC_HCP_WITH_H3K4ME2_AND_H3K27ME3   | 274  | 1.86 | 0.00      | 0.23      |
| LSK_CPG_PROMOTER_H3K27ME3_ONLY               | 656  | 1.84 | 0.00      | 0.00      |
| MIKKELSEN_NPC_HCP_WITH_H3K27ME3              | 279  | 1.82 | 0.00      | 0.17      |
| KEGG_AUTOIMMUNE_THYROID_DISEASE              | 23   | 1.81 | 0.00      | 0.15      |
| SHIN_B_CELL_LYMPHOMA_CLUSTER_5               | 16   | 1.80 | 0.00      | 0.14      |
| MIKKELSEN_MCV6_HCP_WITH_H3K27ME3             | 338  | 1.79 | 0.00      | 0.13      |
| BENPORATH_PRC2_TARGETS                       | 500  | 1.74 | 0.00      | 0.18      |
| MIKKELSEN_MEF_HCP_WITH_H3K27ME3              | 473  | 1.72 | 0.00      | 0.19      |
| MEISSNER_BRAIN_HCP_WITH_H3K27ME3             | 211  | 1.72 | 0.00      | 0.17      |
| KEGG_NEUROACTIVE_LIGAND_RECEPTOR_INTERACTION | 222  | 1.68 | 0.00      | 0.21      |
| MIKKELSEN_MEF_HCP_WITH_H3_UNMETHYLATED       | 165  | 1.68 | 0.00      | 0.21      |
| BIOCARTA_INFLAM_PATHWAY                      | 25   | 1.67 | 0.01      | 0.21      |
| MIKKELSEN_ES_HCP_WITH_H3_UNMETHYLATED        | 46   | 1.66 | 0.01      | 0.21      |
| MIKKELSEN_IPS_WITH_HCP_H3K27ME3              | 80   | 1.64 | 0.00      | 0.22      |
| LSK_BIVALENT                                 | 1318 | 1.12 | 0.07      | 0.04      |
| LT-HSC RNA-seq                               | SIZE | NES  | NOM p-val | FDR q-val |
| LSK_CPG_PROMOTER_H3K27ME3_ONLY               | 515  | 1.86 | 0.00      | 0.00      |
| MEISSNER_NPC_HCP_WITH_H3K4ME2_AND_H3K27ME3   | 205  | 1.82 | 0.00      | 0.01      |
| MIKKELSEN_MEF_HCP_WITH_H3K27ME3              | 324  | 1.81 | 0.00      | 0.01      |
| MIKKELSEN_NPC_HCP_WITH_H3K27ME3              | 200  | 1.79 | 0.00      | 0.01      |
| BENPORATH_PRC2_TARGETS                       | 343  | 1.74 | 0.00      | 0.03      |
| MIKKELSEN_MCV6_ICP_WITH_H3K27ME3             | 40   | 1.66 | 0.00      | 0.06      |
| MEISSNER_NPC_HCP_WITH_H3K4ME3_AND_H3K27ME3   | 98   | 1.63 | 0.00      | 0.09      |
| MIKKELSEN_ES_ICP_WITH_H3K4ME3_AND_H3K27ME3   | 84   | 1.63 | 0.00      | 0.09      |
| MEISSNER_NPC_HCP_WITH_H3K27ME3               | 34   | 1.63 | 0.00      | 0.09      |
| MIKKELSEN_NPC_HCP_WITH_H3K4ME3_AND_H3K27ME3  | 137  | 1.62 | 0.00      | 0.09      |
| MIKKELSEN_MEF_ICP_WITH_H3K27ME3              | 108  | 1.61 | 0.00      | 0.09      |
| MIKKELSEN_IPS_ICP_WITH_H3K4ME3_AND_H327ME3   | 74   | 1.58 | 0.00      | 0.11      |
| MIKKELSEN_ES_HCP_WITH_H3K27ME3               | 18   | 1.54 | 0.02      | 0.15      |
| LSK_BIVALENT                                 | 1396 | 1.37 | 0.00      | 0.00      |
| LSK_CPG_PROMOTER_BIVALENT                    | 450  | 1.09 | 0.16      | 0.07      |
| MPP RNA-seq                                  | SIZE | NES  | NOM p-val | FDR q-val |
| BOYLAN_MULTIPLE_MYELOMA_PCA1_UP              | 78   | 2.01 | 0.00      | 0.00      |
| PASQUALUCCI_LYMPHOMA_BY_GC_STAGE_UP          | 225  | 1.99 | 0.00      | 0.00      |
| MORI_PLASMA_CELL_UP                          | 45   | 1.89 | 0.00      | 0.00      |
| PID_CD8TCRDOWNSTREAMPATHWAY                  | 43   | 1.88 | 0.00      | 0.04      |
| JAATINEN_HEMATOPOIETIC_STEM_CELL_DN          | 149  | 1.88 | 0.00      | 0.04      |
| BIOCARTA_CTLA4_PATHWAY                       | 15   | 1.87 | 0.00      | 0.04      |
| MORI_PLASMA_CELL_UP                          | 37   | 1.78 | 0.00      | 0.09      |
| PID_CD8TCRPATHWAY                            | 44   | 1.77 | 0.00      | 0.09      |
| KEGG_PRIMARY_IMMUNODEFICIENCY                | 28   | 1.71 | 0.00      | 0.16      |
| IVANOVA_HEMATOPOIESIS_MATURE_CELL            | 205  | 1.65 | 0.00      | 0.22      |
| LSK_CPG_PROMOTER_H3K27ME3_ONLY               | 428  | 1.53 | 0.00      | 0.00      |
| LSK_BIVALENT                                 | 1301 | 1.52 | 0.00      | 0.00      |
| MEISSNER_NPC_HCP_WITH_H3K4ME2_AND_H3K27ME3   | 181  | 1.43 | 0.01      | 0.06      |
| MIKKELSEN_MEF_HCP_WITH_H3K27ME3              | 285  | 1.41 | 0.00      | 0.07      |
| LSK_CPG_PROMOTER_BIVALENT                    | 428  | 1.35 | 0.00      | 0.00      |

SIZE: number of genes enriched in dataset

NES: normalized enrichment score

NOM p-val: nominal p-value

FDR q-val: False discovery rate q-value

**Supplementary Table 5. Negatively-enriched gene sets in *Tet1*<sup>-/-</sup> LSK, and MPP expression data by GSEA.**

| LSK microarray                                                            | SIZE | NES        | NOM p-val | FDR q-val |
|---------------------------------------------------------------------------|------|------------|-----------|-----------|
| KEGG_DNA_REPLICATION                                                      | 32   | -1.745     | 0.00      | 0.01      |
| KEGG_MISMATCH_REPAIR                                                      | 22   | -1.825     | 0.00      | 0.00      |
| KEGG_RNA_POLYMERASE                                                       | 25   | -1.858     | 0.00      | 0.01      |
| PID_HDAC_CLASSII_PATHWAY                                                  | 31   | -1.832     | 0.00      | 0.01      |
| REACTOME_DNA_REPAIR                                                       | 94   | -1.639     | 0.01      | 0.01      |
| REACTOME_MEIOTIC_SYNAPSIS                                                 | 32   | 1.538      | 0.02      | 0.14      |
| REACTOME_RNA_POL_I_RNA_POL_III_AND_MITOCHONDRIAL_TRANSCRIPTION            | 66   | -1.498     | 0.01      | 0.03      |
| REACTOME_RNA_POL_II_PRE_TRANSCRIPTION_EVENTS                              | 55   | -1.675     | 0.00      | 0.01      |
| REACTOME_RNA_POL_II_TRANSCRIPTION                                         | 85   | -1.862     | 0.00      | 0.01      |
| REACTOME_RNA_POL_III_TRANSCRIPTION                                        | 30   | -2.070     | 0.00      | 0.00      |
| REACTOME_RNA_POL_III_TRANSCRIPTION_INITIATION_FROM_TYPE_2_PROMOTER        | 21   | -1.785     | 0.01      | 0.01      |
| REACTOME_S_PHASE                                                          | 92   | -1.697     | 0.00      | 0.01      |
| REACTOME_SYNTHESIS_OF_DNA                                                 | 77   | -1.632     | 0.00      | 0.01      |
| REACTOME_TRANSCRIPTION                                                    | 136  | -1.697     | 0.00      | 0.01      |
| MPP RNA-seq                                                               | SIZE | NES        | NOM p-val | FDR q-val |
| REACTOME_RNA_POL_I_PROMOTER_OPENING                                       | 44   | -2.613186  | 0.00      | 0.00      |
| REACTOME_RNA_POL_I_TRANSCRIPTION                                          | 66   | -2.5215938 | 0.00      | 0.00      |
| REACTOME_PACKAGING_OF_TELOMERE_ENDS                                       | 35   | -2.4533944 | 0.00      | 0.00      |
| REACTOME_DEPOSITION_OF_NEW_CENPA_CONTAINING_NUCLEOSOMES_AT_THE_CENTROMERE | 46   | -2.4302628 | 0.00      | 0.00      |
| REACTOME_AMYLOIDS                                                         | 51   | -2.4286585 | 0.00      | 0.00      |
| REACTOME_MEIOTIC_RECOMBINATION                                            | 66   | -2.3482702 | 0.00      | 0.00      |
| REACTOME_MEIOTIC_SYNAPSIS                                                 | 51   | -2.2943957 | 0.00      | 0.00      |
| REACTOME_MEIOSIS                                                          | 86   | -2.221875  | 0.00      | 0.00      |
| REACTOME_TELOMERE_MAINTENANCE                                             | 56   | -2.1949067 | 0.00      | 0.00      |
| REACTOME_RNA_POL_I_RNA_POL_III_AND_MITOCHONDRIAL_TRANSCRIPTION            | 98   | -2.16059   | 0.00      | 0.00      |
| REACTOME_CHROMOSOME_MAINTENANCE                                           | 87   | -1.9773016 | 0.00      | 0.02      |
| KEGG_SYSTEMIC_LUPUS_ERYTHEMATOSUS                                         | 81   | -1.8950058 | 0.00      | 0.06      |
| REACTOME_TRANSCRIPTION                                                    | 167  | -1.8681017 | 0.00      | 0.08      |
| KEGG_DNA_REPLICATION                                                      | 32   | -1.8055322 | 0.01      | 0.14      |

SIZE: number of genes enriched in dataset

NES: normalized enrichment score

NOM p-val: nominal p-value

FDR q-val: False discovery rate q-value

**Supplementary Table 6. Top 20 networks of genes identified by Ingenuity Pathway Analysis that lose 5hmC in gene bodies and promoters.**

| ID | Top Diseases and Functions                                                                     | Molecules in Network                                                                                                                                                                                                                                                                                                   |
|----|------------------------------------------------------------------------------------------------|------------------------------------------------------------------------------------------------------------------------------------------------------------------------------------------------------------------------------------------------------------------------------------------------------------------------|
| 1  | Hereditary Disorder, Ophthalmic Disease, Cancer                                                | ADCK3, ATXN1L, CATSPER1, CCZ1/CCZ1B, COQ4, CPA2, CWC25, DDX41, ESYT1, EXOSC5, FYCO1, HNF4A, HPD, HUNK, ITIH3, MECR, MOCOS, MRPL4, MRPS12, MRPS28, PHPT1, PNPLA6, POLR3E, REXO2, SGCE, SPATA2, ST6GALNAC6, TM7SF2, TME8B, TOR2A, TXNDC12, UROS, WBSR22, ZBTB37, ZNF644                                                  |
| 2  | Cellular Assembly and Organization, Cellular Movement, Nervous System Development and Function | ADAM9, AEBP1, AHS1, AMPH, B3GNT2, BHMT, CTSA, DENND1A, DOK4, Dynamin, Endophilin, EPN1, ERK1/2, KARS, MGAT3, NAGLU, NECAP1, NEU1, PACSIN2, PACSIN3, PFN2, PIGF, PRR14, RTN4R, SARDH, SBSN, SH3GL2, SLC9A5, SNAP91, SYN2, TFEB, TMEFF2, TME55B, TRPM2, UCN3                                                             |
| 3  | Post-Translational Modification, Cell Death and Survival, Cellular Movement                    | ACTR5, AP2A1, ATAD3A, ATXN10, BAG6, CAD, Collagen type I, EEF2, GET4, HECTD3, KIFC2, PFK, PFKL, PHB2, PLOD2, Ppp2c, PPP2CB, PPP2R1A, PPP2R3C, PPP5C, PPP6R3, PRKAC, RAB18, RUVBL2, SHC1, SHCBP1, SLC1A2, SRGAP2, TAB2, TGFBI, TIP60, WRAP53, YEATS4, ZNF384, ZNHIT1                                                    |
| 4  | RNA Post-Transcriptional Modification, Cell Cycle, Nervous System Development and Function     | APLF, CHERP, CPSF3, CPSF4, DHX37, EGR2, EXO1, F7, FARP2, FRYL, GADD45, GIGYF2, HEATR1, KHDRBS3, MAG, ME2, PAPOLA, PASK, RABGGTA, Rac, RECQL, Rho gdi, SART1, SF3B1, SIRT7, SOX8, SOX10, TBL3, TFIP11, U2AF2, UTP15, WDR46, ZCCHC3, ZNF574, ZSCAN12                                                                     |
| 5  | Cell Signaling, Digestive System Development and Function, Cell Cycle                          | AGAP2, Akt, ARHGAP1, ARHGAP12, BNIPL, Caspase 3/7, CDH13, CHCHD2, CHRNA3, Ciap, CNKSR1, DAP3, DAPK3, Erm, Foxp2, GRB14, HIF3A, HOMER2, MAN1C1, MAN2A2, MAN2C1, Mannosidase Alpha, MAPKAPK3, MED25, Naip1 (includes others), NET1, PARG, PPT1, PTK6, PYCR1, RBM38, RhoGap, SEMA7A, STARD13, VARS                        |
| 6  | Cell Cycle, DNA Replication, Recombination, and Repair, Gene Expression                        | CHD2, COPS4, Coup-Tf, CYP4F8, EP400, ETV3, Gsk3, HDAC2, histone deacetylase, I kappa b kinase, IER5L, KLHL22, LGR6, MCM4, MCM10, NR2C1, NSFL1C, PEG10, POU5F1, RAD54B, REPIN1, SAE1, SALL1, SF3a2, SMARCB1, SMARCC1, SOX2-OCT4-NANOG, SS18L1, TFPC2L1, TH2 Cytokine, TMED1, TRIM41, UBXN7, WWP2, ZMYM4                 |
| 7  | Neurological Disease, Ophthalmic Disease, Psychological Disorders                              | Alpha tubulin, BAZ2A, Beta Tubulin, Calmodulin, CETN3, DUB, Dynein, EML1, Gamma tubulin, Hdac, JRK, KCNN1, KCNQ5, LYPLA2, MRPS21, NDEL1, NEURL4, ONECUT2, PCGF3, PDCD6IP, POC5, PPL, SARS2, SCN2A, TSPAN2, TUBA1A, TUBA1B, TUBA1C, TUBGCP2, USP7, USP29, USP32, USP33, USP42, ZNF365                                   |
| 8  | Behavior, Cardiac Enlargement, Cardiovascular Disease                                          | 2700097O09Rik, AGPAT6, ATF6, ATP6V1C2, CCDC25, CPLX1, DYRK1A, EXTL2, FMN2, Insulin, KCNA1, KCNP4, KIAA0232, Klr4 (includes others), LSM1, LSM3, Mitochondrial complex 1, MTORC1, NDUFAF3, NDUFS6, NDUFV3, p70 S6k, Pcp411, PP1-C, PRPF40B, PSEN1, RBP3, RICTOR, RPL22, RPS6, snRNP, SUN5, TCR, TPPP, TSH               |
| 9  | Cellular Assembly and Organization, Tissue Development, Carbohydrate Metabolism                | AKR1B1, chemokine receptor, Cpla2, DUSP22, EIF4EBP2, EXOC4, Fc gamma receptor, FEM1A, Fgf, Fgfr, GALNT13, IDH1, Mapk, NCAN, NUP37, NUP85, PAX7, PEG3, PIAS4, PIGC, PIGH, PLA2, PLA2G6, PLA2G2F, PLAGL1, RGS13, SEH1L, SNX2, SNX4, Tenascin, TUBA8, tubulin (family), WASH1, ZHX1, ZMIZ2                                |
| 10 | Lipid Metabolism, Small Molecule Biochemistry, Carbohydrate Metabolism                         | AIF1L, BSG, CAV3, Caveolin, CLOCK, CTNNAL1, ELOVL2, ERN2, estrogen receptor, FASN, FNDC5, GCK, JPH2, KCTD9, MAPK12, MGP, Mmp, MVP, N-cor, NR1I2, PCBP1, PCCB, PCGF2, PHF19, PLEK2, PPARGC1A, Rar, Rnr, RRP36, Rxr, thymidine kinase, TMRSS15, trypsin, USF2, ZNF335                                                    |
| 11 | Cell Morphology, Cellular Assembly and Organization, Tissue Development                        | Actin, ACTR2, Alpha Actinin, Alpha catenin, Arp2/3, ARPC1B, Cadherin, CCM2, CDH8, CDH11, F Actin, GAS8, GNA12, Ga12/13, IPP, JUP, Ktn1, MCF2L, NEUROG2, NEXN, NKX6-1, PARVG, PCSK2, Pde, PDE11A, PDYN, PITPNM1, PLS1, PTPRQ, RHOA, RPN2, SNX8, SNX33, Troponin t, VAPB                                                 |
| 12 | Lipid Metabolism, Nervous System Development and Function, Post-Translational Modification     | AQP5, AQUAPORIN, BRE, CAPNS1, CASP8AP2, CD300LD, Cyb5r3, Filamin, FREM1, GFPT2, Ikk (family), Integrin, IRF, ITGAX, LDB2, LENG8, LTBR, MAP4K2, Nfkb (complex), NOP14, NSMAF, PKP1, PLA2G2D, PYGO1, RNF25, SEC22B, SLC3A1, SMPD4, sphingomyelinase, ST8SIA1, Talin, Tnf receptor, TRAF, Trim30a/Trim30d, ZNF446         |
| 13 | Lipid Metabolism, Molecular Transport, Small Molecule Biochemistry                             | AAGAB, ABCD2, Adaptor protein 1, Angiotensin II receptor type 1, Ap1 gamma, AP1M1, Ap2 alpha, Arf, ARF3, ARFGEF1, BTG3, CLN3, ERK, FBXO46, GGA2, HMG CoA synthase, HMGCS2, LRP3, M6PR, NCF4, NPC1, NPC1L1, OSGEP, PDGFC, PIP5K1B, Secretase gamma, SIPA1, SLC25A11, SLC25A22, SRD5A1, Sreb, TMSB4, TRIB1, UNC45A, VASN |

|    |                                                                                                      |                                                                                                                                                                                                                                                                                                                                                      |
|----|------------------------------------------------------------------------------------------------------|------------------------------------------------------------------------------------------------------------------------------------------------------------------------------------------------------------------------------------------------------------------------------------------------------------------------------------------------------|
| 14 | Behavior, Nervous System Development and Function, Cell Signaling                                    | ADCY4, ADD1, AHCY, Ampa Receptor, Atrial Natriuretic Peptide, CA8, CaMKII, chymotrypsin, CORO1B, DTNB, GRIA4, inositol-trisphosphate 3-kinase, IPMK, ITPKA, ITPKC, ITPR, KCNC4, L-type Calcium Channel, MYOZ1, MYOZ3, NPR2, Pdgf Ab, PDLIM5, PEBP1, PER1, PER3, PHACTR3, PITPNB, Pkc(s), PMP22, PPI protein complex group, REM1, SNTG1, STXBP3, TCAP |
| 15 | Cell Cycle, DNA Replication, Recombination, and Repair, Cellular Movement                            | ANAPC11, APC (complex), BRMS1, CCDC77, CCNB1, Cdc2, CDC20, Cdk, CNTROB, Cyclin B, DFFB, DLX5, DNMI1, Histone H1, KIF14, LATS2, MARS, MOB3B, MXD1, MYT1, Pka, Pka catalytic subunit, PPI, PPIG, PPP1R3A, RNA polymerase I, Sin3, SKP2, SNPH, TAF1B, TCHP, TNFRSF13B, Tnp2, UBE3D, UBTf                                                                |
| 16 | Developmental Disorder, Hereditary Disorder, Metabolic Disease                                       | ARMC3, Calbindin, Cbp/p300, CCDC101, CCNK, CSRP2BP, ELL2, FLOT1, Gcn5l, GTF2B, HEXIM2, Holo RNA polymerase II, Igg3, IgG2b, Igh (family), KCNH6, LY86, MED20, mediator, MIR124, NECA2, NR1D2, P-TEFb, POLR2K, PTK2B, PTOV1, REST, SCG3, SLC22A2, SLC22A12, SLC7A14, SPIB, TADA3, TCEA3, XKR4                                                         |
| 17 | DNA Replication, Recombination, and Repair, Energy Production, Nucleic Acid Metabolism               | 19S proteasome, 20s proteasome, 26s Proteasome, 3 beta HSD, ABHD4, APH1A, ATP5D, ATPase, CENPB, CSAD, Ctpb, FAM65A, GAS5, IGF1, KDM4A, MAP1LC3B, MHC CLASS I (family), MSH2, MUS81, OSBPL7, PSMA, PSMA7, PSMC, PSMC1, PSMC2, PSMC4, PSMD3, PSMD5, SEZ6L2, SRSF3, SYT10, TK1, TOR3A, TRA2B, Ubiquitin                                                 |
| 18 | DNA Replication, Recombination, and Repair, Cellular Compromise, Cell Morphology                     | ADCY, ADRB, APEX1, CAMSAP1, CD3, CD160, CDC40, Ck2, cytochrome C, FAM13B, FOXA2, HIST1H2BA, Histone h3, Histone h4, Ifn gamma, LRWD1, MAX, MPHOSPH9, NBN, PARP1, PCYT2, PLC, Proinsulin, PRPF19, PYGL, RAB17, SKIL, SMC3, STAG2, SYPL2, TRAF3IP1, TRIM29, YWHAG, ZBTB44, ZZEF1                                                                       |
| 19 | Cellular Assembly and Organization, Cell Morphology, Cell-To-Cell Signaling and Interaction          | C16orf45, C17orf96, CDC42BPB, CELA2A, CPNE1, elastase, ENO2, ETS, FERMT2, Fibrin, GM2A, GOLPH3, growth factor receptor, Integrin, MPZL2, MRPL36, MUC5B, MYL12A, MYO18A, PDGFB, PLXNA1, PMEPA1, PROZ, Ptk, PTK7, PTPRA, PXX, Ras, RNF111, RNF167, RRAS, Smad2/3, Sos, UBE2M, ZAP70                                                                    |
| 20 | Embryonic Development, Organismal Development, Skeletal and Muscular System Development and Function | ACO2, Aconitase, APC, APC2, APC/APC2, AXIN1, Casein, CD34, CK1, CLASP1, CSNK1G1, CSNK1G3, Dishevelled, GCM2, Gli, Glycogen synthase, HCN4, Hedgehog, Importin beta, IPO8, ISCA1, MAPRE3, MCM3AP, MYBPH, Nes, NUP50, P38 MAPK, PITX2, SFRP1, SLC18A2, TCF, TNNT3, Wnt, WNT3, WNT7A                                                                    |



**Supplementary Table 7. Disease categories of genes that lose 5hmC by Ingenuity Pathway Analysis.**

| Diseases or Functions and Categories          | p-Value           |
|-----------------------------------------------|-------------------|
| Molecular Transport                           | 1.67E-07-1.22E-02 |
| Cancer                                        | 3.34E-07-1.27E-02 |
| Cellular Growth and Proliferation             | 8.3E-06-1.19E-02  |
| Cellular Assembly and Organization            | 1.68E-05-1.29E-02 |
| Cellular Function and Maintenance             | 1.68E-05-1.06E-02 |
| Small Molecule Biochemistry                   | 2.32E-05-1.14E-02 |
| Cell Death and Survival                       | 7.77E-05-1.27E-02 |
| Hematological System Development and Function | 7.04E-04-1.17E-02 |
| Hematopoiesis                                 | 7.04E-04-1.17E-02 |
| DNA Replication, Recombination, and Repair    | 9.04E-04-1.26E-02 |
| Nucleic Acid Metabolism                       | 9.04E-04-8.58E-03 |
| Lymphoid Tissue Structure and Development     | 1.67E-03-1.16E-02 |
| Cell Cycle                                    | 2.06E-03-1.27E-02 |
| Hematological Disease                         | 2.15E-03-1.27E-02 |
| Immunological Disease                         | 2.15E-03-1.27E-02 |

**Supplementary Table 8. Genes with gene body and promoter 5hmC loss and 5mC gain.**

| Overlapping Genes | Gene Symbol                                                                                                                                                                                                                                                                                                                                                                                                                                                                                                                                                                                                                                                                                                                                                                                                                                                                                                                                                                                                       |
|-------------------|-------------------------------------------------------------------------------------------------------------------------------------------------------------------------------------------------------------------------------------------------------------------------------------------------------------------------------------------------------------------------------------------------------------------------------------------------------------------------------------------------------------------------------------------------------------------------------------------------------------------------------------------------------------------------------------------------------------------------------------------------------------------------------------------------------------------------------------------------------------------------------------------------------------------------------------------------------------------------------------------------------------------|
| 127               | <p><i>Adam2, Adamts15, Adrald, Aebp1, Agpat6, Aldh1l2, Ankrd26, Aqp5, Armc3, Atg9b, C330005M16Rik, Camsap1, Catsper1, Ccdc92, Cd160, Cdh11, Cdh13, Cdk3-ps, Chchd2, Cplx1, Cpxm1, Cybasc3, D5Erd579e, Dbx2, Efh2, Eif3l, Engase, Exo1, Fam193b, Fhdc1, Gabrp, Gal3st1, Galnt13, Gdf1, Gm996, Gm10565, Gna12, Golph3, Gpsm2, H2-M10.2, Htr6, Inpp5f, Irf5, Irf8, Jph2, Kcna1, Kcnk10, Kcnn1, Kiss1r, Klhl1, Klhl25, Krt71, Krt83, Lgi2, Lgr6, Lhfp14, Mamdc2, Man1c1, Meis3, Mmp16, Mogat2, Myo18a, Necab2, Neu1, Neurog2, Nexn, Ngef, Nos1, Npepl1, Npr2, Onecut2, Opalin, Pax7, Pex10, Phactr3, Pigf, Pitpnm1, Pkp1, Ptk2b, Ptprcap, Pycr1, Pygl, Qrfpr, Rab37, Rab44, Rabgap1, Rasef, Rem1, Rgs8, Rtn2, Scg3, Sebox, Shcbp1, Slc1a2, Slc4a11, Slc7a14, Slc22a12, Slc24a2, Slc35e4, Slc45a1, Snx8, Snx22, Sox8, Spire2, Srrm4, Srsf12, St8sia1, Sult2b1, Syn2, Sypl2, Tbccd1, Thbs4, Tk1, Tmem8b, Tmem51, Tmem198, Tnfrsf13b, Trim36, Tuba8, Usp33, Usp42, Vmn2r29, Wdr86, Wnk4, Zfp384, Zfp687, Zscan12</i></p> |

**Supplementary Table 9. Sequenom Epityper assay primers used for quantitative *TET1* DNA methylation assays.**

| Sequence Description | Sequence (5'-3')               |
|----------------------|--------------------------------|
| MA_TET1h_1F          | GGGTTATATAAGATTTATTTTAGGTTTGG  |
| MA_TET1h_1R          | CCTACACAAAAAAAAACAAAATTCC      |
| MA_TET1h_11F         | GAAATGTAATGAGGGATTGAATTTT      |
| MA_TET1h_11R         | AAAATACCAAATCAAAAATAACACCA     |
| MA_TET1h_13F         | TGGTGTTATTTTTGATTGGTATTTT      |
| MA_TET1h_13R         | CAATATCTCCCCAAAACAAACCT        |
| MA_TET1h_17F         | TTTTATTTTTTGAGGTTTGTTTTGG      |
| MA_TET1h_17R         | ATCCCACAAC TTAAAACCC           |
| MA_TET1h_21F         | GTTGGTGTAGGTTTGGAGTTGG         |
| MA_TET1h_21R         | AACTCCCCAAAAAACCAAAAAC         |
| MA_TET1h_22F         | GTTGGTTTTTTTGGTTTTTTTGG        |
| MA_TET1h_22R         | AACAAAAC TACACCACTACCTCCAC     |
| MA_TET1h_23F         | TTATAAGAAGTGGTTTGGAAAGGGAT     |
| MA_TET1h_23R         | cCACTCAAATCCAAAAAAAACCTAAA     |
| MA_TET1h_25F         | TTAGGTTTTTTTTGGATTGAGTGT       |
| MA_TET1h_25R         | CCCAAATTATAAACCTAAACTCCTC      |
| MA_TET1h_26F         | TTTTTTTG TAAAGATGAGGAGTTTAGG   |
| MA_TET1h_26R         | CAAAAAAACATAACACACAACAAAA      |
| MA_TET1h_31F         | TTTTGTTGTGTGTTATGTTTTTTTGG     |
| MA_TET1h_31R         | AACAACACCTAACTCAATTCCTCC       |
| MA_TET1h_33F         | TTTAGTTGTTGGAGGAAATTGAGTT      |
| MA_TET1h_33R         | CCAAAATCATACCACTACACTCTAACC    |
| MA_TET1h_37F         | GGTTTATTGTAATTTTTGTTTTTGGG     |
| MA_TET1h_37R         | AAACAAC TATACTAACCCCTATACCATCA |

**Supplementary Table 10. NanoString nCounter Elements design details for mRNA expression quantitation**

| Gene name | Accession      | Position  | Target Sequence                                                                                      | NSID                |
|-----------|----------------|-----------|------------------------------------------------------------------------------------------------------|---------------------|
| Hprt      | NM_013556.2    | 31-130    | TGCTGAGCGCGGAGAGCGTGGGCTTACCTCACTGCTTCCGGAGCGGTAGCACCTCTCCGCGGGTCTCTCTCAGACCGCTTTTGGCCGGA            | NM_013556.2:30      |
| Actin     | NM_007393.1    | 816-915   | CAGGTCACTACTATTGGCAACGAGCGGTCCGATGCCTGAGGCTCTTTCCAGCCTTCCTCTTGGGTATGGAATCCTGTGGCATCCATGAAACTACAT     | NM_007393.1:815     |
| Gapdh     | NM_001001303.1 | 891-990   | AGGTTGTCTCTGCGACTCAACAGCACTCCCACTTCCCACTTCGATGCGGGGCTGGCATTGCTCAATGACAACTTGTCAAGCTCAATTCCTG          | NM_001001303.1:890  |
| Hist1h1a  | NM_030609.2    | 353-452   | GGCGTCTGGCTCTTTAAAGCTGAACAAGAAGGCTGAGTCCAAAGGCATCACCAAGGTGTCAAGTGAAGCGAAAGCATCCGGGGCTGCTAAGA AAC     | NM_030609.2:352     |
| Hist1h1b  | NM_020034.1    | 543-642   | AAAAGCAGCAAAGAGCCCGCAAGCCAAAGCGGTGAAGTCTAAGGCATCAAACTAAGGTTACCAAGCCTAAGACCCTAAGCCTAAGGCTGCCAAG       | NM_020034.1:542     |
| Hist1h1c  | NM_015786.1    | 1006-1105 | TCCTGTTTATTGGGCGCCATCCGAAGTTTGTAGCTTCTGCCTGGAGAAACGCATCCGGGGCTGTAGGTGGCTTCTATGCTCAGCCTCTTTGTGGG      | NM_015786.1:1005    |
| Hist1h1d  | NM_145713.3    | 2091-2190 | GGAAAGACACAGGCTCTAAAAGATGGTTTTGACCTCCACAGGCCAGTGTGTGTAAGTCAACCTCTGCTCACATCTAGCCCAGATAAGGTAAGGCTA     | NM_145713.3:2090    |
| Hist1h1e  | NM_015787.3    | 1017-1116 | CTCCCGCTGCCAGCTGCATAACTTTAAAGGAGATAGCAGAATGATTTAGAGATAGAATCTTAAGCATTGAGCGATTGCTGCGTAAAGAGCAGGATCG    | NM_015787.3:1016    |
| Hist1h2ac | NM_178189.4    | 2414-2513 | GGGGCCAGGTGTTAAACTTGACAGATGTGAACAGCTGAAGTCTCAGCCAGGCCAGCATGGCTTTATTTCAGGATCC                         | NM_178189.4:2413    |
| Hist1h2ag | NM_178186.2    | 222-321   | CGGGCAACGCGGCCGCGACAACAAGAAGACGCGCATATCCCGCGCACCTGCAGCTGGCCATCCGCAAGGACGAGGAGCTCAACAAGCTGTGGGCCG     | NM_178186.2:221     |
| Hist1h2bb | NM_175664.2    | 39-138    | TTGTGTCTCTTTTGAACAGAATGCCAGAGCTTCTAAGTCTGCACCAGCCCTAAGAAGGGATCTAAGAAAGCCATCTCTAAGGCGCAGAAGAAGGA      | NM_175664.2:38      |
| Hist1h2bf | NM_178195.1    | 55-154    | GTGACCAAGGCCAGAAGAAGACGCGCAAGAAGCGCAAGCGCAGCCGCAAGGAGAGACTACTCGGTGTACGTGTACAAGGTGCTGAAGCAAGTGCACCCCG | NM_178195.1:54      |
| Hist1h3b  | NM_178203.1    | 122-221   | GCTACCGTCCCGCACCCTGGCGCTGCGCGAGATCCGGCGCTACCAAGAAGTGCACCGAGCTGCTGATCCGCAAGCTCCGCTTCCAGCGCTGGTGC      | NM_178203.1:121     |
| Hist1h3c  | NM_175653.1    | 367-466   | GCCAAGCGTCCACCATCATGCCAAGGACATCCAGCTCGCCCGCCATCCCGGAGAGAGGGCATAATGTTTTATGCTATTTAAAAAAGGCTCTT         | NM_175653.1:366     |
| Hist1h4f  | NM_175655.1    | 36-135    | CAAAGCGCGCTAAGCGCCACCGTAAGTCTTCCGCGATAACATCCAGGGCATCAACAAGCCCGCATCCGCGCCCTGGCCCGCGGAGGAGTGAAG        | NM_175655.1:35      |
| Hist4h4   | NM_175652.2    | 806-905   | TTTCTCAGCTGAGCTGTTTCTGCTTAAACAGCTGGGTTGGGGAAAGAGGAGCAGCTCGGATGCTACCATTTAGTTCAGGCTGGTATAAGTCTTTC      | NM_175652.2:805     |
| Hmgn1     | NM_008251.3    | 836-935   | CCCTTGCCCTGCAGAACTGTGATGCTGTGGTTCATGGCAGTCCATTTTCTCAACAGTTGTGATAATGTGCTGTGAAAGATGGAAGTCTGAGTCTGTTCC  | NM_008251.3:835     |
| Hmgb2     | NM_008252.3    | 1668-1767 | ATGTGTTGGAAACTGTGTAGATGTTGAAAGTATTATACCAGGCTGGGTGGTGGCAGGTACATGCAATCCAGAGTGGAAAGTATAGAGAGGGGACG      | NM_008252.3:1667    |
| Pcna      | NM_011045.2    | 591-690   | AGACCTTAGCCACATTGGAGATGCTGTTGTGATACCTGTGCAAAAGATGGGGTGAAGTTTTCTGCAAGTGGAGAGCTTGGCAATGGGAACATTAAGTTG  | NM_011045.2:590     |
| Rad51     | NM_011234.4    | 287-386   | CAGCCTATTTACGGTTAGAGCAGTGTGGCAATAATGCCAATGATGTGAAGAATTTAGAAGAAGCCGGTTACCATACAGTGGAGGCTGTTGCTTATGCAC  | NM_011234.4:286     |
| Ercc8     | NM_028042.3    | 1895-1994 | ACTCAAAGTGAATGGCTCATGTAATCGAGCTCTTCCGCTCATATTGAATGTTAGCACTCATGCATCTTGCAGTGTGAACATCGTATCACATAGGCA     | NM_028042.3:1894    |
| Fen1      | NM_001271614.1 | 1881-1980 | TAGTACTGACCAGCTGATTTTGGGGCAGAAATTTGAACCTGCTGCTGAGTCCAGTGTGTGCAAGGAGTGGAGTGGCAGTGTAAAGTTTTGA          | NM_001271614.1:1880 |
| Lig1      | NM_001083188.1 | 1457-1556 | TACTATTTCTGGAGTCTTCAACAAATCTGTGACATTCGCCGCTCACTGGCAGTGTCTCATGGCCAAAGAGATGGACATTAACAAGGGCTTTTGT       | NM_001083188.1:1456 |
| Ercc2     | NM_007949.4    | 1801-1900 | TCTGCTCAGTGGCTCGGGCAAGATATCAGAAGGGATTGACTTTGTACACCACTACGGACGGCTGTGATCATGTTTGGAGTCCCTATGCTATACC       | NM_007949.4:1800    |
| Alkbh3    | NM_026944.1    | 1069-1168 | CAGAAAGCGTGGTGTGCTTCTCAGGTTTACTCTCTGTAATGAGAGCTGCCACAGCTCACCTTGTCAACATGTCTACTACAGGAACACTTACTTTG      | NM_026944.1:1068    |
| Ccnh      | NM_023243.2    | 961-1060  | GACTATGTGTCAAAGAAACCAACAGGAAGAGGAGGAATGGACTGATGACGACCTGGTAGATTCTCTAACCAATAAATGACCCGACGAGTACTTA       | NM_023243.2:960     |
| Polr2b    | NM_153798.2    | 1091-1190 | CGGTTCAAGAGGGGCAAGCCTGGTGTACTAAGGAGAAAAGAAATTAATATGCAAAAGAAAGTCTACAGAAAGAAATGCTCCCTCAGTGGTGTGAGT     | NM_153798.2:1090    |
| Rfc2      | NM_020022.2    | 979-1078  | ATTTTCCGAGTGTCAAACCTTCCGATGGCTGAATACTTGAACCTGGAGTTTCATCAAGGAGATTGGATACACTCACATGAAAGTGGCGGAAGGAGTGA   | NM_020022.2:978     |
| Rpa1      | NM_026653.2    | 931-1030  | GCGCCCTGAAGATCGCTAACAAACAGTTCGCTGTTAAAAATGACTATGAGATGACCTTCAATGAGACTTCTGCTTCCCTGTGAAGATGGCCA         | NM_026653.2:930     |
| Rpa2      | NM_011284.3    | 501-600   | TCCAGAAACAAAGAGCTTGTGGCTTTAAGATCATCTCTGGAAGACATGAATGAGTTCACCACACATCTGGAAAGTGGTCAATTCACACATGAT        | NM_011284.3:500     |
| Rfc5      | NM_028128.1    | 313-412   | AATGCTCTGACACCGAGGATCGATATTGTTCCGGGCCAATCTCAGCTTTGCCAGCAAGCAATCTTCAAGAAAGGGTTAAGCTTGTGATCC           | NM_028128.1:312     |
| Pole      | NM_011132.2    | 824-923   | CTTTCTGTGAAATCACCCGACGAGATGATCTTGTGAAACGACCTGACCTGTGGTTTTGGCATTGACATCGAGACGACCAAACTGCCTCTCAAATT      | NM_011132.2:823     |
| Ogg1      | NM_010957.4    | 169-268   | TCACTGTGTGCGAGGCTTTAGGACTTGGGAAAGTCGAGTCTGATTGGACAGTCCGCTAATGGGCTGGGGCTGCTAGCCGAATGTTATCCGTTCTCTGG   | NM_010957.4:168     |
| Ercc3     | NM_133658.1    | 556-655   | AAGGTCAAGCTGCTCCTCAAGCAACAGGTACTTTGTTGAAAGTTCCACCTGATGTTATCCAGCATCTTCTCAAGACCCAGTGTCCGGGAATGTC       | NM_133658.1:555     |
| Alkbh2    | NM_175016.2    | 631-730   | CACGTTTTCTGGTCTTACCCTGACACCAAGCCCTGGGTTCTGTTCTAGAGCGTGTTCGAGATCGAGTCTGCGAGGTGACAGGACAGACCTTCAACTTT   | NM_175016.2:630     |
| Atr       | NM_019864.1    | 4393-4492 | AGGAGTTGCTTTCTATTATGACTGTAGAGAGATGCAGAGCAATGCCACAGTTTACCAGTTGTGGAAGAAATCCCTGAGCATGTCGGGAAATATTAGA    | NM_019864.1:4392    |
| Polr2l    | NM_025593.1    | 349-448   | AAGTCTGTTACCCTGGAAGGAACTGTTTAAAGATGTTGACAGAACCAACAGGTCTAACTTCAAGGTGCTCCATGCTCATGCTGTGCTGTCT          | NM_025593.1:348     |
| Palb2     | NM_001081238.1 | 2571-2670 | GCTGGTCTAAGGAGCCATGTATCGTAAGTGTGTGAAGATGAGTTTCTTTGAAACCCCTGAAATTTCTGCAAGTGGGAGAAAGTTCATACCTGCG       | NM_001081238.1:2570 |
| Apex1     | NM_009687.2    | 290-389   | AAACCTCACCAAGTGGCAACTGCCACTCAAGATGCTCTGGAATGTTGGATGGGCTTCCGACCTGATTAAGAAAGAAAGTTGGATTGGGTA           | NM_009687.2:289     |
| Nth1      | NM_008743.2    | 35-134    | GCGGGCTGCTCGGAGGAGTGTTCACAGCCAGGCATGAACCTCAGGGGTGCGGATGTTGACTCGCAGTGGAGCCGCGCACTAGGATCCGCTCGGAAG     | NM_008743.2:34      |
| Rad21     | NM_009009.4    | 1217-1316 | GATTGTTGACAGTGTCAAAGAATGGATAGTAAGACCTTAGAGCCAGCTAGCGATTATTTCTGATATTGTTACGACTTGGAGCTGGCTCCGCCAAC      | NM_009009.4:1216    |

**Supplementary Table 11. Primers used for V(D)J rearrangement PCR analysis.**

| <b>Primer</b> | <b>5' to 3' sequence</b>           |
|---------------|------------------------------------|
| C $\mu$ 5'    | TGGCCATGGGCTGCCTAGCCCGGGACTT       |
| C $\mu$ 3'    | GCCTGACTGAGCTCACACAAGGAGGA         |
| Jh4           | TCCCTCAAATGAGCCTCCAAAGTCC          |
| Dh            | TTCAAAGCACAAATGCCTGGCT             |
| Vh558         | CGAGCTCTCCARCACAGCCTWCATGCARCTCARC |
| Vh7183        | CGGTACCAAGAASAMCCTGTWCCTGCAAATGASC |
| V $\kappa$    | GGCTGCAGSTTCAGTGGCAGTGGRTCWGGGRAC  |
| J $\kappa$    | ATGCGACGTCAACTGATAATGAGCCCTCTCC    |
| V1 $\lambda$  | GCCATTTCCCCAGGCTGTTGTGACTCAGG      |
| J $\lambda$   | ACTCACCTAGGACAGTCAGCTTGGTTCC       |
